# Supplementary material
Source: PubMed Central journal article supplement (PMC1467020)

Supplemental Materials

For

Parallel Synthesis and Antimalarial Screening of  
a 4-Aminoquinoline Library

*Peter B. Madrid<sup>1</sup>, Nathan Wilson<sup>2</sup>, Joseph L. DeRisi<sup>2</sup>, R. Kiplin Guy<sup>1,3,\*</sup>*

University of California, San Francisco, CA

<sup>1</sup>Department of Pharmaceutical Chemistry, <sup>2</sup>Department of Biochemistry and Biophysics, and <sup>3</sup>Department of Cellular and Molecular Pharmacology, University of California, San Francisco, CA

| Compound | Yield | Purity |  | Compound | Yield | Purity |
|----------|-------|--------|--|----------|-------|--------|
| 1{1,2}   | 10.2% | 100.0% |  | 1{1,13}  | 25.4% | 88%    |
| 1{2,2}   | 23.9% | 30.6%  |  | 1{2,13}  | 6.4%  | 71%    |
| 1{3,2}   | 29.8% | 95.2%  |  | 1{3,13}  | 12.6% | 100%   |
| 1{4,2}   | 24.7% | 100.0% |  | 1{4,13}  | 34.3% | 100%   |
| 1{5,2}   | 19.5% | 87.8%  |  | 1{5,13}  | 11.5% | 100%   |
| 1{6,2}   | 4.8%  | 80.2%  |  | 1{6,13}  | 8.2%  | 77%    |
| 1{7,2}   | 21.7% | 100.0% |  | 1{7,13}  | 23.9% | 98%    |
| 1{8,2}   | 40.7% | 100.0% |  | 1{8,13}  | 31.7% | 99%    |
| 1{9,2}   | 11.6% | 80.5%  |  | 1{9,13}  | 9.3%  | 95%    |
| 1{10,2}  | 27.1% | 95.0%  |  | 1{10,13} | 20.6% | 100%   |
| 1{11,2}  | 15.1% | 87.8%  |  | 1{11,13} | 9.7%  | 87%    |
| 1{12,2}  | 26.4% | 85.8%  |  | 1{12,13} | 19.2% | 90%    |
| 1{13,2}  | 56.1% | 90.1%  |  | 1{13,13} | 43.6% | 100%   |
| 1{14,2}  | 23.8% | 97.9%  |  | 1{14,13} | 15.3% | 100%   |
| 1{15,2}  | 79.1% | 100.0% |  | 1{15,13} | 75.0% | 88%    |
| 1{16,2}  | 53.3% | 100.0% |  | 1{16,13} | 38.9% | 98%    |
| 1{17,2}  | 11.1% | 84.4%  |  | 1{17,13} | 5.0%  | 85%    |
| 1{18,2}  | 12.4% | 97.3%  |  | 1{18,13} | 12.6% | 97%    |
| 1{19,2}  | 2.7%  | 72.2%  |  | 1{19,13} | 8.4%  | 86%    |
| 1{20,2}  | 66.6% | 90.8%  |  | 1{20,13} | 15.6% | 100%   |
| 1{21,2}  | 39.8% | 99.2%  |  | 1{21,13} | 52.4% | 100%   |
| 1{22,2}  | 29.2% | 99.0%  |  | 1{22,13} | 40.4% | 100%   |
| 1{23,2}  | 47.6% | 100.0% |  | 1{23,13} | 74.4% | 84%    |
| 1{24,2}  | 83.4% | 90.3%  |  | 1{24,13} | 40.1% | 100%   |

**Table S1.** Final yields and purities of library **1**. Yields were calculated based on the molar amount of the limiting reagent and the mass of final purified product obtained. Purity was assessed by analytical HPLC analysis monitored at 220 nm on a reversed-phase C18 column (Column Engineering, ReliaSil C18 BDX, 5  $\mu$ M).

| Compound                  | IC50 (nM) | Q-scores    |              |             |              |
|---------------------------|-----------|-------------|--------------|-------------|--------------|
|                           |           | 30nM @ 72Hr | 200nM @ 72Hr | 30nM @ 96Hr | 200nM @ 96Hr |
| CQ                        | 23.5      | 0           | 0            | 0           | 0            |
| 4-amino-7-chloroquinoline |           | -12.88      | -15.79       | -24.60      | -40.52       |
| 1{1,2}                    |           | -1.81       | 0.00         | -0.95       | -0.43        |
| 1{3,2}                    |           | na          | -0.47        | na          | -0.87        |
| 1{4,2}                    |           | -5.52       | 0.05         | -19.98      | -0.43        |
| 1{5,2}                    |           | -4.70       | 0.34         | -9.98       | -0.35        |
| 1{6,2}                    |           | -12.30      | 0.16         | -23.83      | -0.26        |
| 1{7,2}                    |           | -8.75       | 0.66         | -23.25      | -0.30        |
| 1{8,2}                    |           | -7.97       | 0.23         | -22.20      | -0.70        |
| 1{9,2}                    |           | -7.45       | 0.16         | -24.50      | -0.57        |
| 1{10,2}                   |           | -7.94       | 0.23         | -23.20      | -0.48        |
| 1{11,2}                   |           | -12.43      | -0.06        | -25.00      | -0.43        |
| 1{12,2}                   |           | -4.03       | 0.00         | -20.40      | -0.30        |
| 1{13,2}                   | 19.5      | -1.32       | 0.00         | -1.08       | -0.35        |
| 1{14,2}                   |           | -6.65       | 0.11         | -20.58      | -0.17        |
| 1{15,2}                   |           | -12.52      | -7.69        | -23.43      | -27.61       |
| 1{16,2}                   | 11.0      | 0.32        | 0.23         | 0.25        | -0.13        |
| 1{17,2}                   |           | -13.08      | -3.89        | -24.50      | -12.13       |
| 1{18,2}                   |           | -9.77       | -2.11        | -24.85      | -2.26        |
| 1{19,2}                   |           | -10.04      | 0.23         | -23.68      | -0.48        |
| 1{20,2}                   |           | -10.34      | -0.11        | -22.23      | -0.35        |
| 1{21,2}                   | 19.5      | -0.36       | -0.11        | -0.10       | -0.57        |
| 1{22,2}                   | 18.5      | -0.09       | -0.06        | -0.10       | -0.83        |
| 1{23,2}                   |           | -11.44      | 0.00         | -23.43      | -0.48        |
| 1{24,2}                   |           | -12.34      | -2.34        | -23.13      | -3.83        |
| 1{1,13}                   |           | -10.06      | 0.23         | -19.90      | -0.35        |
| 1{2,13}                   |           | -11.88      | 0.16         | -25.15      | -0.30        |
| 1{3,13}                   |           | -6.60       | -1.03        | -21.53      | -1.17        |
| 1{4,13}                   |           | -5.18       | 0.34         | -18.68      | -0.30        |
| 1{5,13}                   |           | -8.75       | -1.77        | -22.05      | -6.61        |
| 1{6,13}                   |           | -8.95       | -2.18        | -23.68      | -2.04        |
| 1{7,13}                   |           | -8.12       | -3.48        | -22.70      | -13.17       |
| 1{8,13}                   |           | -8.86       | -3.37        | -26.23      | -14.00       |
| 1{9,13}                   |           | -9.55       | 0.34         | -22.35      | -0.43        |
| 1{10,13}                  |           | -8.90       | -3.48        | -24.60      | -12.35       |
| 1{11,13}                  |           | -12.34      | -5.94        | -25.35      | -29.65       |

|                 |      |        |        |        |        |
|-----------------|------|--------|--------|--------|--------|
| <b>1{12,13}</b> |      | -10.73 | -2.97  | -21.85 | -9.35  |
| <b>1{13,13}</b> |      | -7.61  | -3.03  | -21.23 | -10.91 |
| <b>1{14,13}</b> |      | -11.51 | -3.82  | -24.65 | -15.35 |
| <b>1{15,13}</b> |      | -13.26 | -1.66  | -24.98 | -2.61  |
| <b>1{16,13}</b> |      | -12.30 | -0.26  | -25.33 | -2.00  |
| <b>1{17,13}</b> |      | -15.74 | -14.66 | -23.33 | -40.52 |
| <b>1{18,13}</b> |      | -10.78 | -4.27  | -25.58 | -16.35 |
| <b>1{19,13}</b> |      | -12.01 | -3.08  | -25.10 | -8.35  |
| <b>1{20,13}</b> |      | -10.64 | -2.81  | -24.98 | -2.70  |
| <b>1{21,13}</b> |      | -11.47 | -3.42  | -23.35 | -5.61  |
| <b>1{22,13}</b> |      | -12.52 | -4.63  | -23.65 | -15.78 |
| <b>1{23,13}</b> | 17.0 | 0.14   | 0.11   | 0.15   | -0.43  |
| <b>1{24,13}</b> |      | -12.94 | -13.34 | -22.70 | -43.22 |

**Table S2.** Full activity data for library **1**. Q-scores are a normalized activity measure calculated as (Parasite survival in presence of CQ – Parasite survival in presence of compound) / (Parasite survival in presence of CQ). IC<sub>50</sub>s were estimated from dose response curves from 1 nm to 200 nm drug concentrations.

**Compound 1{1,2}**

<sup>1</sup>H NMR (CD<sub>3</sub>OD): δ 8.49 (d, J = 8.7, 1H), δ 8.46 (d, J = 6.8, 1H), δ 7.90 (d, J = 1.9, 1H), δ 7.72 (dd, J = 8.7, J = 1.9, 1H), δ 6.98 (d, J = 6.8, 1H), δ 3.74 (t, J = 6.8, 2H), δ 3.25 – 3.35 (m, overlap w/solvent), δ 3.14 (m, 2H), δ 2.22 (m, 2H), δ 1.77 (m, 2H), δ 1.35 (t, J = 6.8, 3H), δ 1.03 (t, J = 6.8, 3H). MS: ESI+ 306.0 [M + 1] Calc. Mass: 305.2.

**Compound 1{3,2}**

<sup>1</sup>H NMR (CD<sub>3</sub>OD): δ 8.57 (d, J = 8.8, 1H), δ 8.47 (d, J = 6.8, 1H), δ 7.91 (d, J = 1.9, 1H), δ 7.72 (dd, J = 8.8, J = 1.9, 1H), δ 7.02 (d, J = 6.8, 1H), δ 3.75 (m, 2H), δ 3.25 – 3.35 (m, overlap w/solvent), δ 3.16 (m, 2H), δ 3.04 (d, J = 5.8, 2H), δ 2.28 (m, 2H), δ 2.15 (m, 1H), δ 1.75 (m, 2H), δ 1.06 (d, J = 5.8, 6H), δ 1.00 (t, J = 6.8, 3H). MS: ESI+ 333.9 [M + 1] Calc. Mass: 333.2.

**Compound 1{4,2}**

<sup>1</sup>H NMR (CD<sub>3</sub>OD): δ 8.52 (d, J = 8.8 Hz, 1H), δ 8.46 (d, J = 5.9 Hz, 1H), δ 7.90 (d, J = 1.9, 1H), δ 7.00 (dd, J = 5.9, J = 1.9, 1H), δ 3.75 (t, J = 4.88, 2H), δ 3.42 (m, 2H), δ 3.42 (m, 2H), δ 3.20 – 3.35 (m, overlap w/solvent), δ 3.13 (d, J = 6.8, 2H), δ 2.26 (m, 2H), δ 1.80 (m, 2H), δ 1.16 (m, 1H), δ 1.03 (t, J = 6.8, 3H), δ 0.75 (m, 2H), δ 0.46 (m, 2H). MS: ESI+ 332.0 [M + 1] Calc. Mass: 331.2.

**Compound 1{7,2}**

<sup>1</sup>H NMR (CD<sub>3</sub>OD): δ 8.52 (d, J = 9.7, 1H), δ 8.46 (d, J = 6.8, 1H), δ 7.90 (d, J = 1.9, 1H), δ 7.72 (dd, J = 8.8, J = 1.9, 1H), δ 7.00 (d, J = 6.8, 1H), δ 3.74 (t, J = 6.8, 2H), δ 3.25 – 3.35 (m, overlap w/solvent), δ 3.18 (m, 4H), δ 2.25 (m, 2H), δ 1.77 (m, 2H), δ 1.64 (m, 3H), δ 1.02 (t, J = 6.8, 3H), δ 0.96 (d, J = 6.8, 6H). MS: ESI+ 348.1 [M + 1] Calc. Mass 347.2.

**Compound 1{8,2}**

<sup>1</sup>H NMR (CD<sub>3</sub>OD): δ 8.57 (d, J = 9.7, 1H), δ 8.47 (d, J = 5.8, 1H), δ 7.91 (d, J = 1.9, 1H), δ 7.72 (dd, J = 8.8, J = 1.9, 1H), δ 7.02 (d, J = 6.8, 1H), δ 3.76 (m, 2H), δ 3.25 – 3.40 (m, overlap w/solvent), δ 3.21 (m, 4H), δ 2.26 (m, 2H), δ 1.79 (m, 2H), δ 1.65 (m, 2H), δ 0.93 – 1.04 (m, 12H). MS: ESI+ 361.9 [M + 1] Calc. Mass 361.2.

**Compound 1{14,2}**

<sup>1</sup>H NMR (CD<sub>3</sub>OD): δ 8.45 (d, J = 6.8, 1H), δ 8.40 (d, J = 8.8, 1H), δ 7.92 (d, J = 1.9, 1H), δ 7.74 (dd, J = 8.8, J = 1.9, 1H), δ 7.45 (m, 4H), δ 6.91 (d, J = 6.8, 1H), δ 4.43 (d, J = 12.6, 1H), δ 4.32 (d, J = 12.6, 1H), δ 3.69 (t, J = 4.8, 2H), δ 3.25 – 3.35 (m, overlap w/solvent), δ 3.16 (t, J = 8.8, 2H), δ 2.27 (m, 1H), δ 2.20 (m, 1H), δ 1.85 (m, 2H), δ 1.01 (t, J = 7.8, 3H). MS: ESI+ 446.0 [M + 1] Calc. Mass 445.1.

**Compound 1{22,2}**

<sup>1</sup>H NMR (CD<sub>3</sub>OD): δ 8.47 (d, J = 8.8, 1H), δ 8.45 (d, J = 6.8, 1H), δ 7.91 (d, J = 1.9, 1H), δ 7.72 (m, 2H), δ 7.48 (m, 1H), δ 7.27 (d, J = 4.8, 1H), δ 6.95 (d, J = 6.8, 1H), δ 4.44 (s, 2H), δ 3.71 (t, J = 5.7, 2H), δ 3.25 – 3.35 (m, overlap w/solvent), δ 3.11 (m, 2H), δ 2.27 (m, 2H), δ 1.83 (m, 2H), δ 0.99 (t, J = 6.8, 3H). MS: ESI+ 373.8 [M + 1] Calc. Mass 373.1

**Compound 1{23,2}**

<sup>1</sup>H NMR (CD<sub>3</sub>OD): δ 9.07 (s, 1H), δ 8.58 (d, J = 8.8, 1H), δ 8.46 (m, 1H), δ 8.01 (m, 1H), δ 7.91 (d, J = 1.9, 1H), δ 7.70 (dd, J = 8.8, J = 1.9, 1H), δ 7.04 (d, J = 8.8, 1H), δ 4.67 (s, 2H), δ 3.78 (m, 2H), δ 3.44 (m, 2H), δ 3.25 – 3.35 (m, overlap w/solvent), δ 3.21 (m, 2H), δ 2.38 (m, 2H), δ 1.89 (m, 2H), δ 1.03 (t, J = 5.8, 3H). MS: ESI+ 358.0 [M + 1] Calc. Mass 357.2

**Compound 1{3,13}**

<sup>1</sup>H NMR (CD<sub>3</sub>OD): δ 8.45 (m, 2H), δ 7.91 (d, J = 1.9, 1H), δ 7.73 (dd, J = 8.8, J = 1.9, 1H), δ 7.53 (m, 2H), δ 7.40 (m, 3H), δ 6.96 (d, J = 6.8, 1H), δ 4.43 (sb, 2H), δ 3.72 (t, J = 6.8, 2H), δ 3.25 – 3.25 (m, overlap w/solvent), δ 2.33 (m, 2H), δ 2.10 (m, 1H), δ 1.04 (d, J = 6.8, 3H), δ 0.96 (d, J = 6.8, 3H). MS: ESI+ 381.9 [M + 1] Calc. Mass 381.2

**Compound 1{4,13}**

<sup>1</sup>H NMR (CD<sub>3</sub>OD): δ 8.44 (m, 2H), δ 7.91 (d, J = 1.95, 1H), δ 7.71 (dd, J = 8.8, J = 1.9, 1H), δ 7.54 (m, 2H), δ 7.35 (m, 3H), δ 6.94 (d, J = 6.8, 1H), δ 4.54 (d, J = 12.7, 1H), δ 4.40 (d, J = 12.7, 1H), δ 3.71 (t, J = 6.8, 2H), δ 3.25 – 3.35 (m, overlap w/solvent), δ 3.13 (m, 2H), δ 2.28 (m, 2H), δ 1.23 (m, 1H), δ 0.76 (d, J = 7.8, 2H), δ 0.43 (m, 2H). MS: ESI+ 380.0 [M + 1] Calc. Mass 379.2

**Compound 1{5,13}**

<sup>1</sup>H NMR (CD<sub>3</sub>OD): δ 8.48 (d, J = 8.8, 1H), δ 8.47 (d, J = 6.8, 1H), δ 7.91 (d, J = 1.9, 1H), δ 7.74 (dd, J = 8.8, J = 1.9, 1H), δ 7.58 (m, 2H), δ 7.44 (m, 3H), δ 6.99 (d, J = 6.8, 1H), δ 4.50 (d, J = 12.6, 1H), δ 4.39 (d, J = 12.6, 1H), δ 3.74 (t, J = 6.8, 2H), δ 3.43 (t, J = 7.8, 2H), δ 3.15 – 3.30 (m, overlap w/solvent), δ 2.40 (m, 2H), δ 0.98 (s, 9H). MS: ESI+ 396.0 [M + 1] Calc. Mass 395.2

**Compound 1{7,13}**

<sup>1</sup>H NMR (CD<sub>3</sub>OD): δ 8.44 (d, J = 6.8, 1H), δ 8.43 (d, J = 8.8, 1H), δ 7.91 (d, J = 1.9, 1H), δ 7.73 (dd, J = 8.8, J = 1.9, 1H), δ 7.53 (m, 2H), δ 7.35 (m, 3H), δ 6.93 (d, J = 6.8, 1H), δ 4.41 (d, J = 3.9, 2H), δ 3.70 (t, J = 6.8, 2H), δ 3.25 – 3.35 (m, overlap w/solvent), δ 3.19 (m, 2H), δ 2.27 (m, 2H), δ 1.67 (m, 3H), δ 0.92 (d, J = 4.8, 6H). MS: ESI+ 396.1 [M + 1] Calc. Mass 395.2

**Compound 1{8,13}**

<sup>1</sup>H NMR (CD<sub>3</sub>OD): δ 8.45 (m, 2H), δ 7.91 (d, J = 1.9, 1H), δ 7.73 (dd, J = 8.8, J = 1.9, 1H), δ 7.54 (m, 2H), δ 7.37 (m, 3H), δ 6.94 (d, J = 6.8, 2H), δ 4.41 (sb, 2H), δ 3.71 (t, J = 6.8, 2H), δ 3.25 – 2.35 (m, overlap w/solvent), δ 3.21 (m, 2H), δ 2.26 (m, 2H), δ 1.70 (m, 2H), δ 0.92 (s, 9H). MS: ESI+ 409.9 [M + 1] Calc. Mass 409.2

**Compound 1{9,13}**

<sup>1</sup>H NMR (CD<sub>3</sub>OD): δ 8.45 (d, J = 6.8, 1H), δ 8.41 (d, J = 8.8, 1H), δ 7.91 (d, J = 1.9, 1H), δ 7.73 (dd, J = 8.8, J = 1.9, 1H), δ 7.53 (m, 2H), δ 7.37 (m, 3H), δ 6.94 (d, J = 6.8, 1H), δ 4.42 (d, J = 3.9, 2H), δ 3.71 (t, J = 5.8, 2H), δ 3.20 – 3.35 (m, overlap w/solvent), δ 2.56 (t, J = 6.8, 2H), δ 2.26 (m, 4H), δ 2.12 (m, 2H), δ 2.07 (s, 3H). MS: ESI+ 413.7 [M + 1] Calc. Mass 413.2

**Compound 1{13,13}**

<sup>1</sup>H NMR (CD<sub>3</sub>OD): δ 8.43 (d, J = 6.8, 1H), δ 8.35 (d, J = 8.8, 1H), δ 7.91 (d, J = 1.9, 1H), δ 7.71 (dd, J = 8.8, J = 1.9, 1H), δ 7.52 (m, 4H), δ 7.37 (m, 6H), δ 6.87 (d, J = 6.8, 1H), δ 4.42 (sb, 4H), δ 3.64 (t, J = 6.8, 2H), δ 3.25 – 3.35 (m, overlap w/solvent), δ 3.26 (m, 2H), δ 2.27 (m, 2H). MS: ESI+ 415.6 [M + 1] Calc. Mass 415.2

**Compound 1{14,13}**

<sup>1</sup>H NMR (CD<sub>3</sub>OD): δ 8.45 (d, J = 6.8, 1H), δ 8.30 (d, J = 9.7, 1H), δ 7.91 (d, J = 1.9, 1H), δ 7.74 (dd, J = 8.8, J = 1.9, 1H), δ 7.53 (m, 2H), δ 7.48 (d, J = 8.8, 2H), δ 7.41 (d, J = 8.8, 2H), δ 7.39 (m, 3H), δ 6.86 (d, J = 6.8, 1H), δ 4.44 (sb, 2H), δ 4.30 (d, J = 16.6, 2H), δ 3.64 (t, J = 6.8, 2H), δ 3.25 – 3.35 (m, overlap w/solvent), δ 3.21 (m, 2H), δ 2.26 (m, 2H). MS: ESI+ 494.0 [M + 1] Calc. Mass 493.1

**Compound 1{18,13}**

<sup>1</sup>H NMR (CD<sub>3</sub>OD): δ 8.44 (d, J = 6.8, 1H), δ 8.40 (d, J = 8.8, 1H), δ 7.91 (d, J = 1.9, 1H), δ 7.77 (dd, J = 8.8, J = 1.9, 1H), δ 7.17 – 7.40 (m, 10H), δ 6.90 (d, J = 6.8, 1H), δ 4.40 (d, J = 4.8, 2H), δ 3.66 (t, J = 6.8, 2H), δ 3.25 – 3.35 (m, overlap w/solvent), δ 3.15 (m, 1H), δ 2.84 (m, 1H), δ 2.73 (m, 1H), δ 2.10 (m, 3H), δ 1.28 (d, J = 6.8, 3H). MS: ESI+ 457.5 [M + 1] Calc. Mass 457.2

**Compound 1{20,13}**

<sup>1</sup>H NMR (CD<sub>3</sub>OD): δ 8.87 (d, J = 4.8, 2H), δ 8.44 (dd, J = 8.8, J = 6.8, 2H), δ 8.38 (d, J = 4.8, 2H), δ 7.91 (d, J = 1.9, 1H), δ 7.72 (dd, J = 8.8, J = 1.9, 1H), δ 7.55 (m, 2H), δ 7.29 (m, 3H), δ 6.93 (d, J = 6.8, 1H), δ 4.45 (m, 4H), δ 3.69 (t, J = 6.8, 2H), δ 3.25 – 3.35 (m, overlap w/solvent), δ 2.40 (m, 2H). MS: ESI+ 417.0 [M + 1] Calc. Mass 416.2

**Compound 1{23,13}**

<sup>1</sup>H NMR (CD<sub>3</sub>OD): δ 9.036 (s, 1H), δ 8.46 (d, J = 8.8, 1H), δ 8.43 (d, J = 6.8, 1H), δ 7.97 (s, 1H), δ 7.92 (d, J = 1.9), δ 7.70 (dd, J = 8.8, J = 1.9, 1H), δ 7.60 (m, 2H), δ 7.30 (m, 3H), δ 6.92 (d, J = 6.8, 1H), δ 4.69 (s, 2H), δ 4.49 (s, 2H), δ 3.69 (m, 2H), δ 3.34 (m, 2H), δ 2.34 (m, 2H). MS: ESI+ 405.6 [M + 1] Calc. Mass 405.2

**Compound 1{24,13}**

<sup>1</sup>H NMR (CD<sub>3</sub>OD): δ 8.45 (m, 2H), δ 7.93 (d, J = 1.9, 1H), δ 7.86 (d, J = 2.9, 1H), δ 7.72 (m, 2H), δ 7.59 (m, 2H), δ 7.39 (m, 3H), δ 6.94 (d, J = 6.8, 1H), δ 4.58 (m, 2H), δ 3.71 (t, J = 6.8, 2H), δ 3.44 (t, J = 6.8, 2H), δ 3.25 – 2.35 (m, overlap w/solvent), δ 2.38 (m, 2H).  
MS: ESI+ 422.5 [M + 1] Calc. Mass 422.1



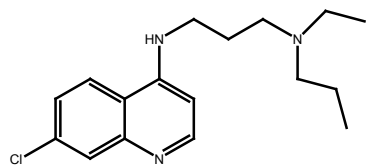

Compound 1{1,2}

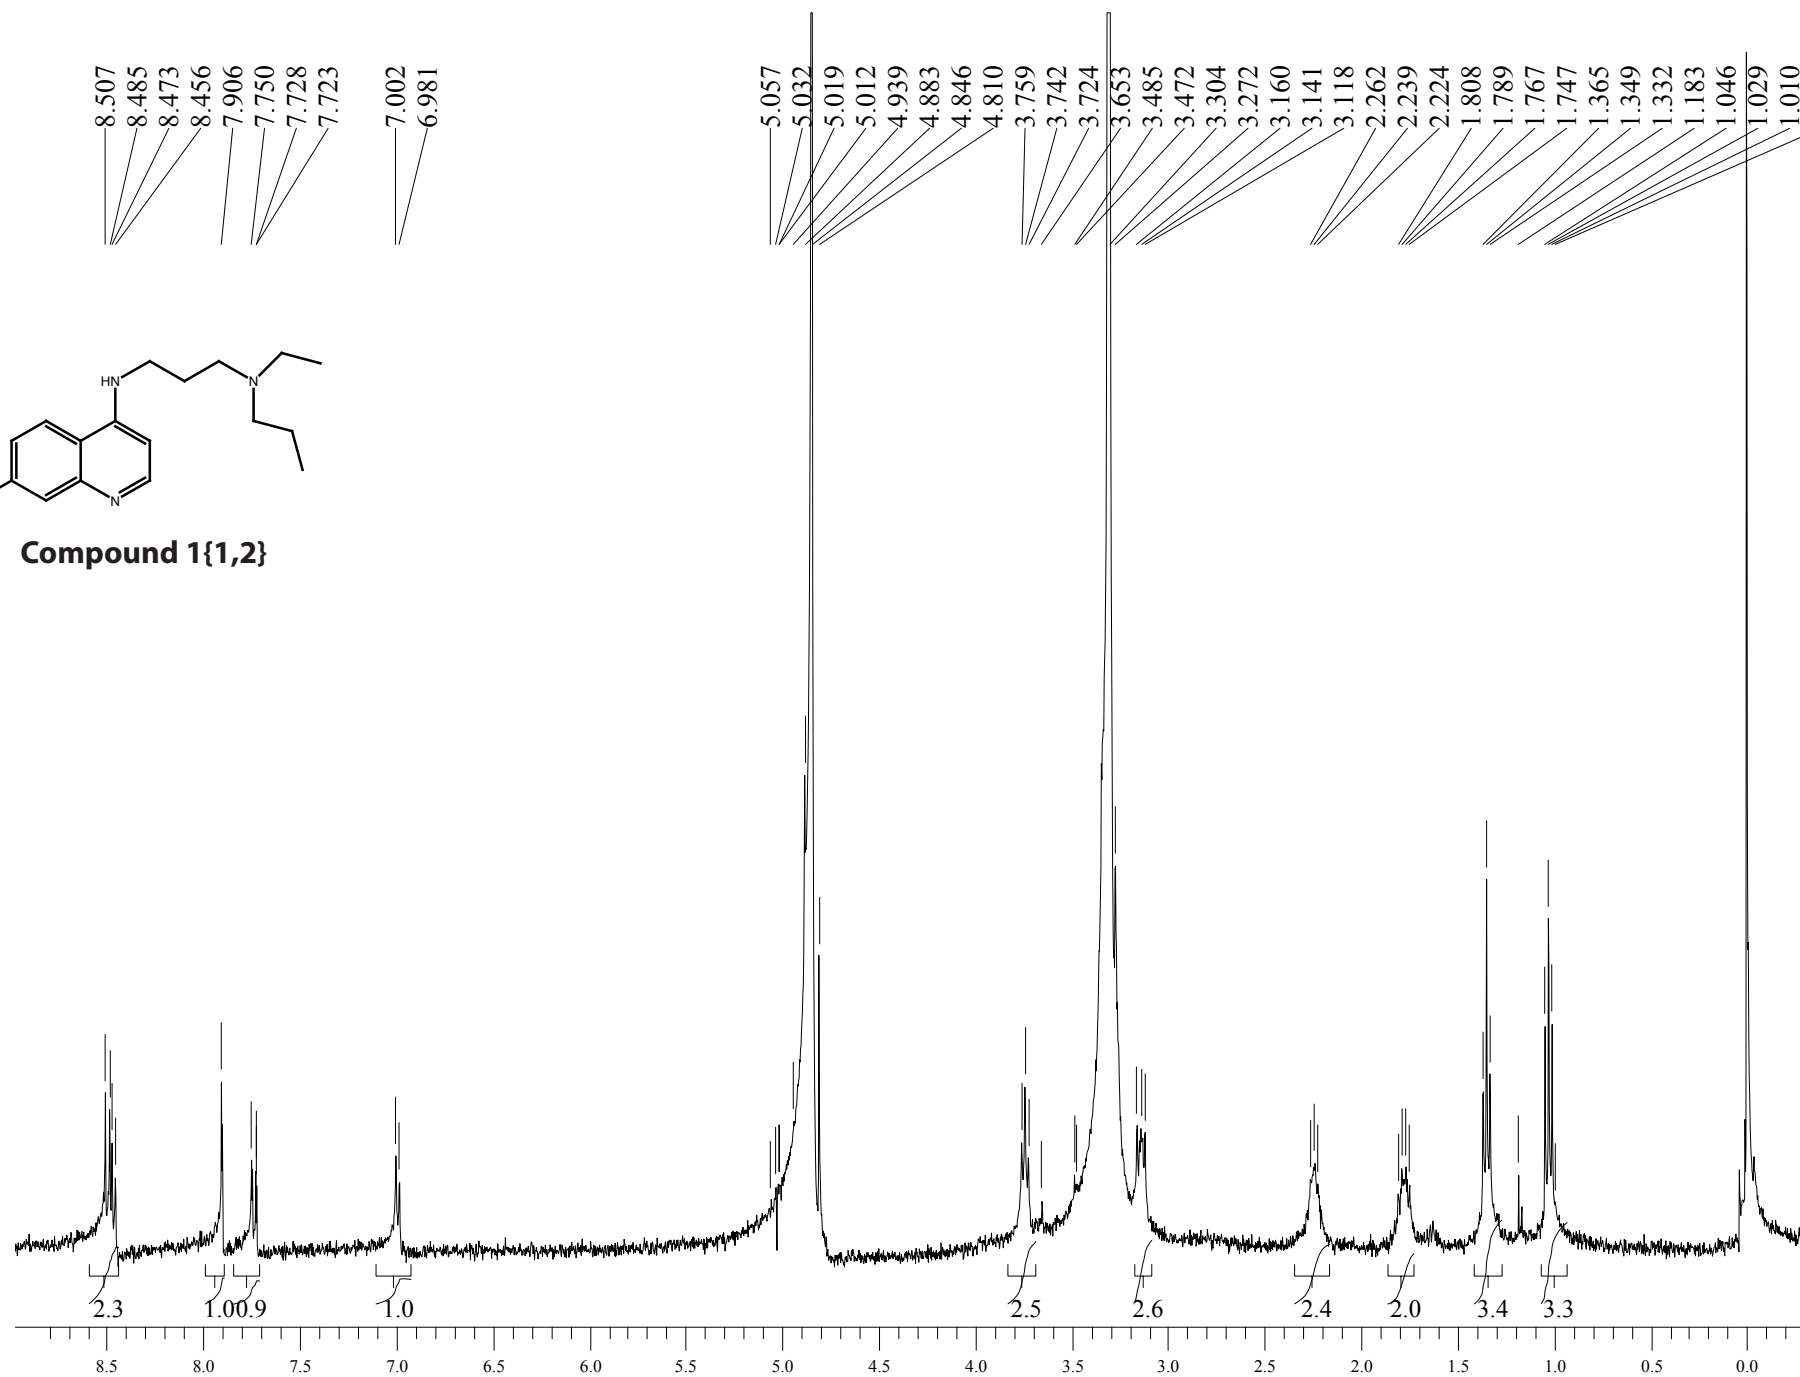

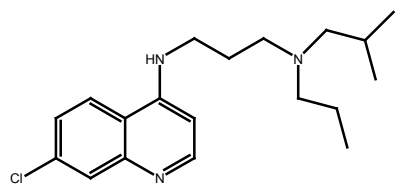

**Compound 1{3,2}**

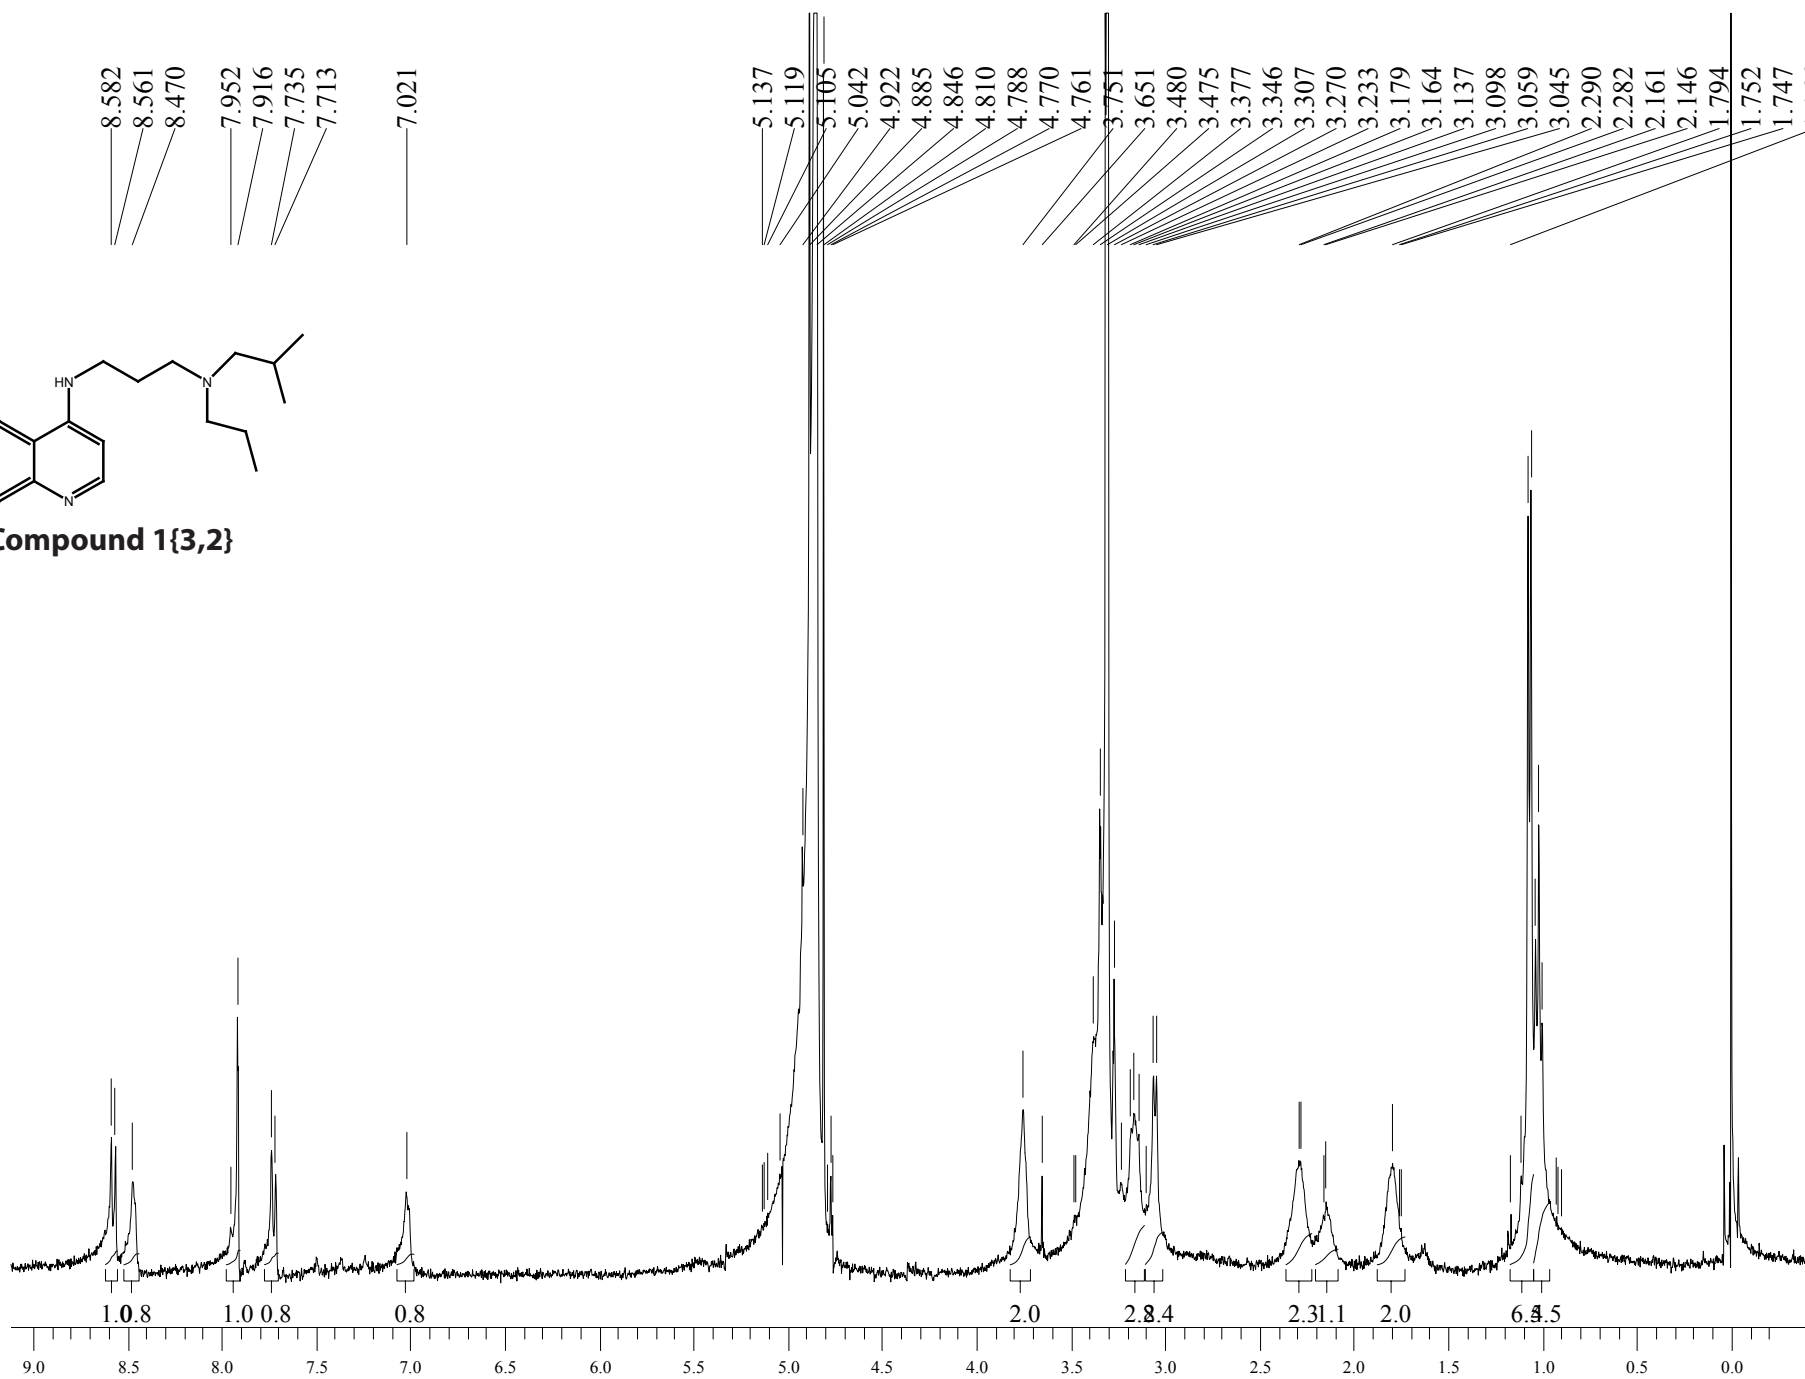

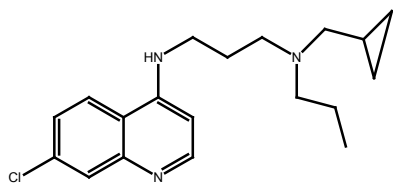

Compound 1{4,2}

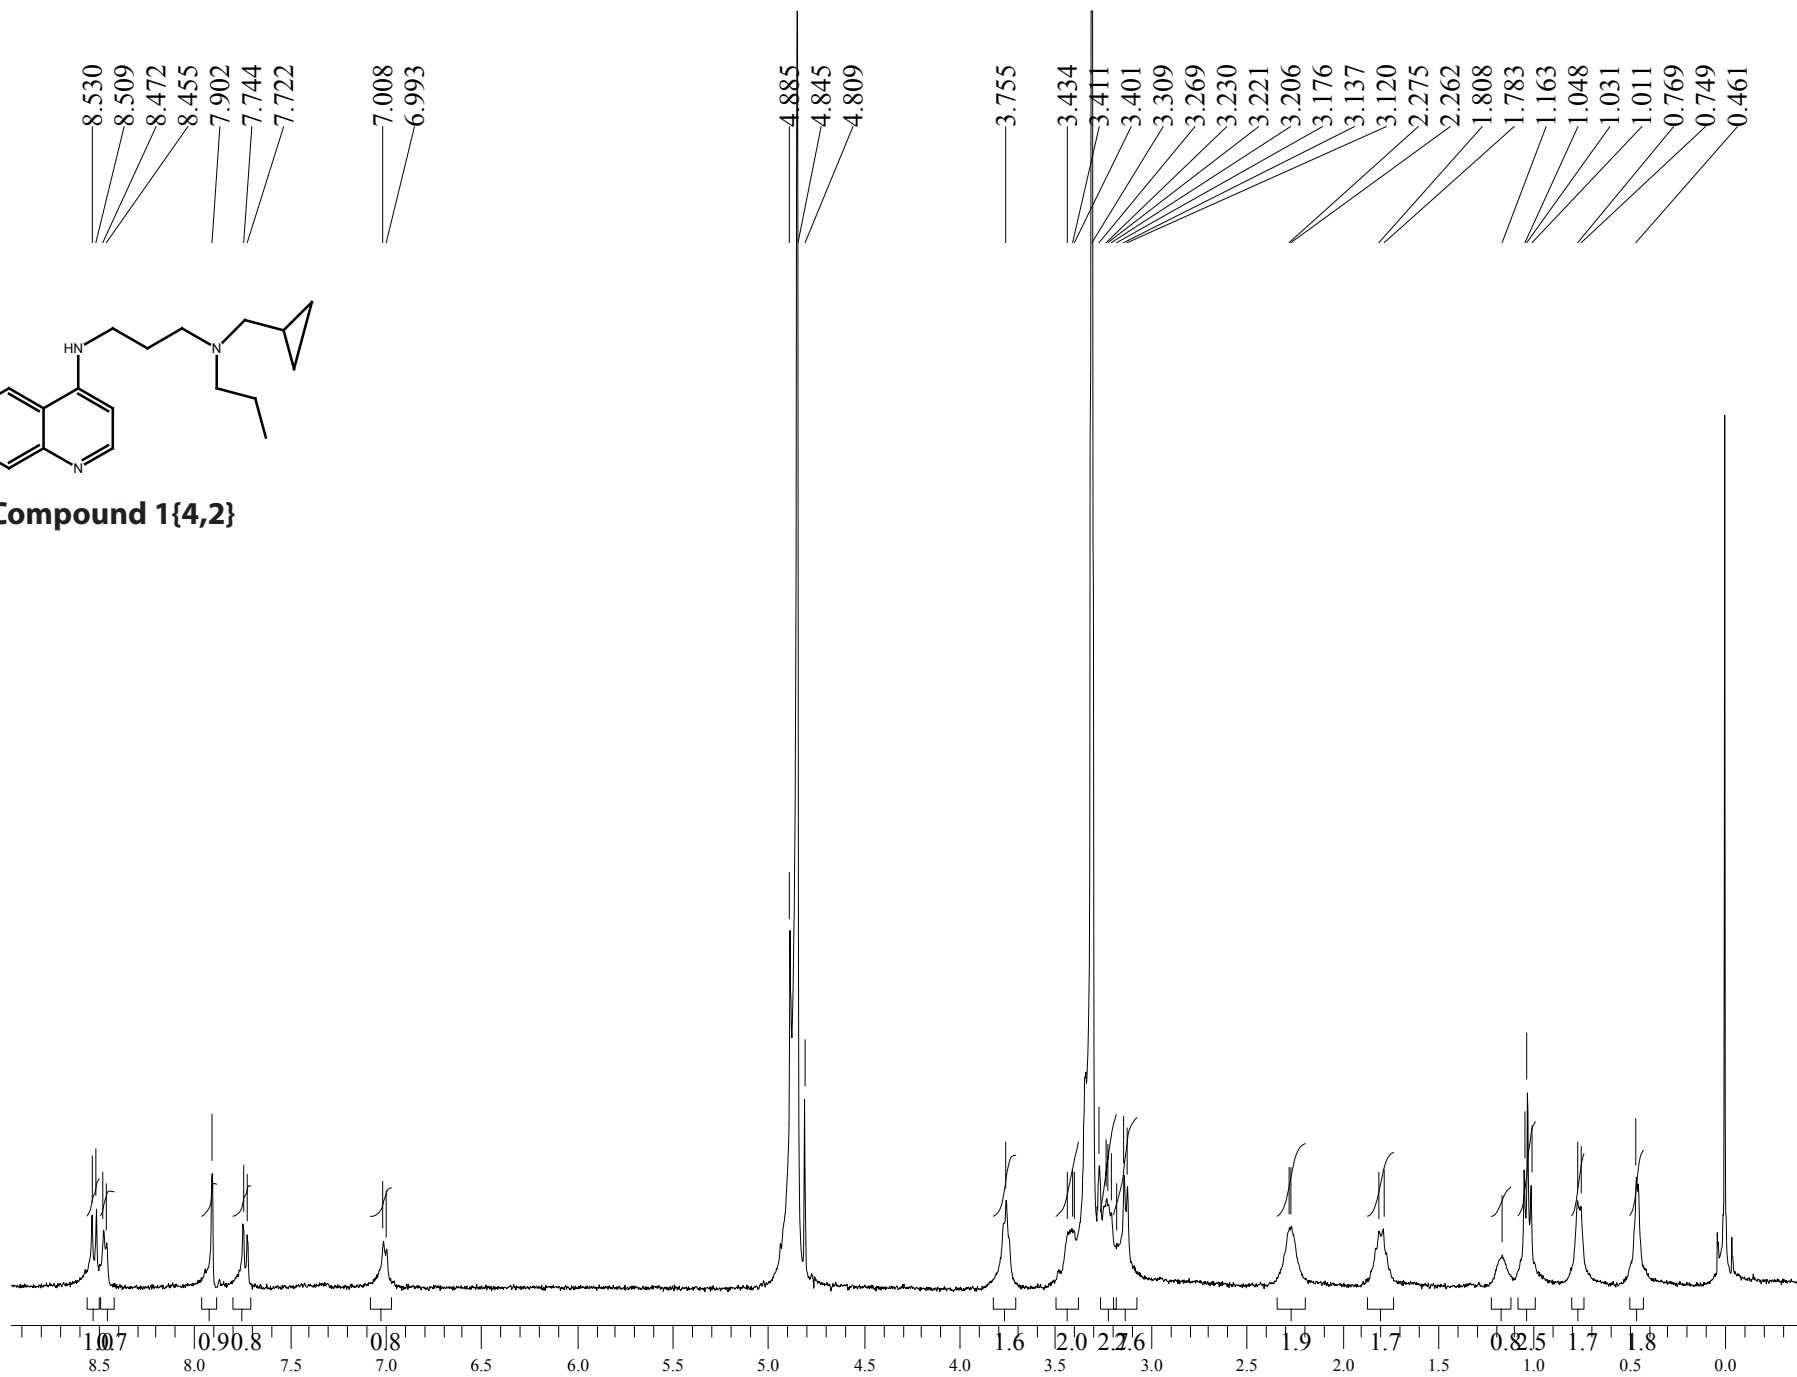

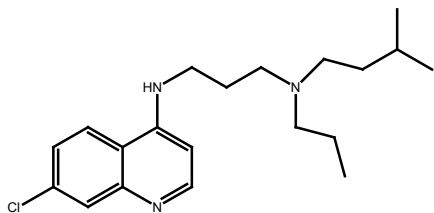

**Compound 1 {7,2}**

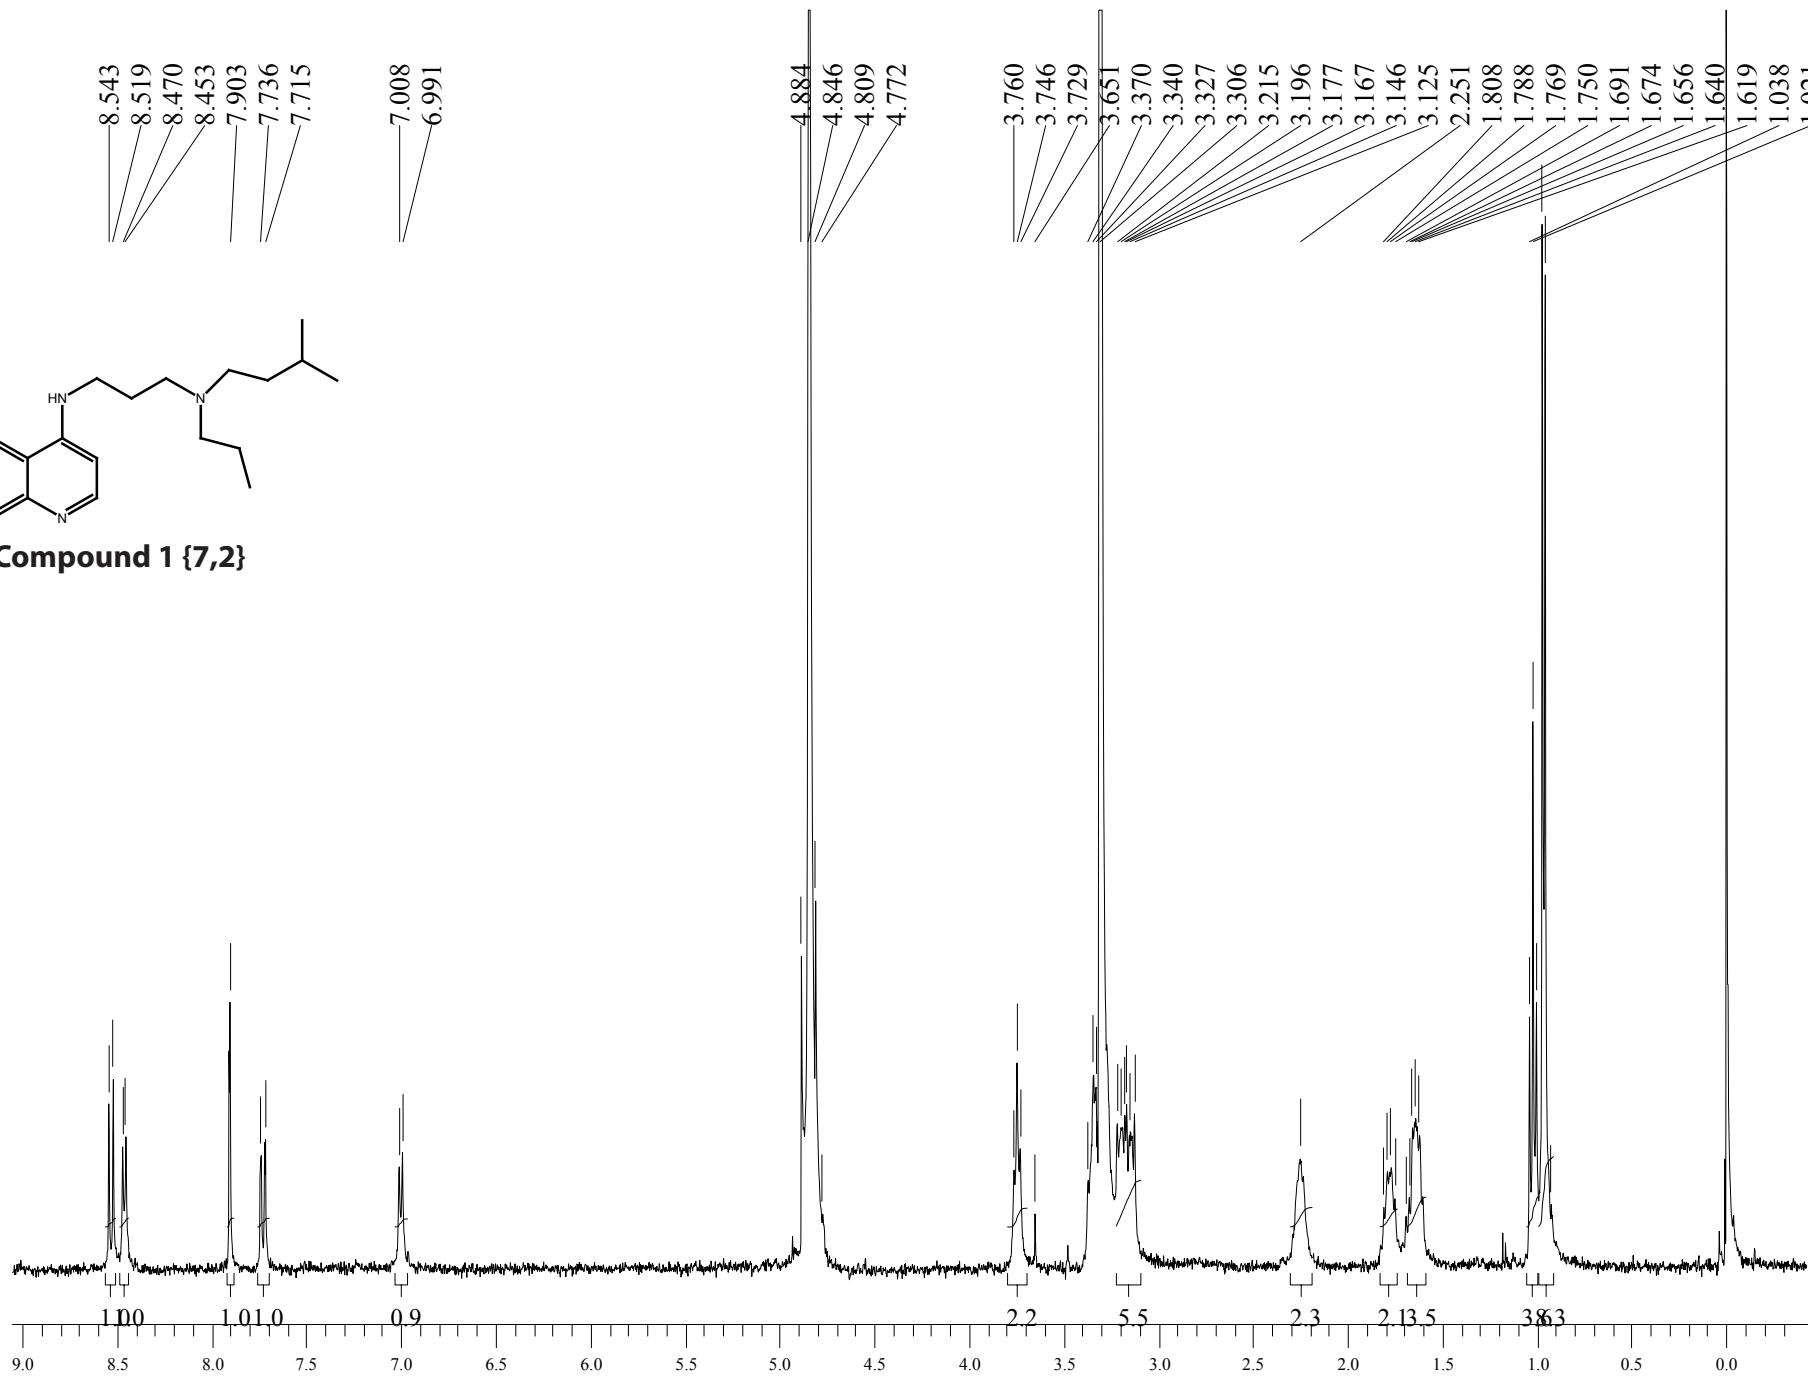

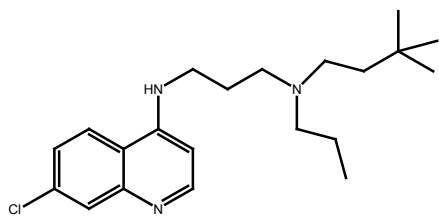

**Compound 1{8,2}**

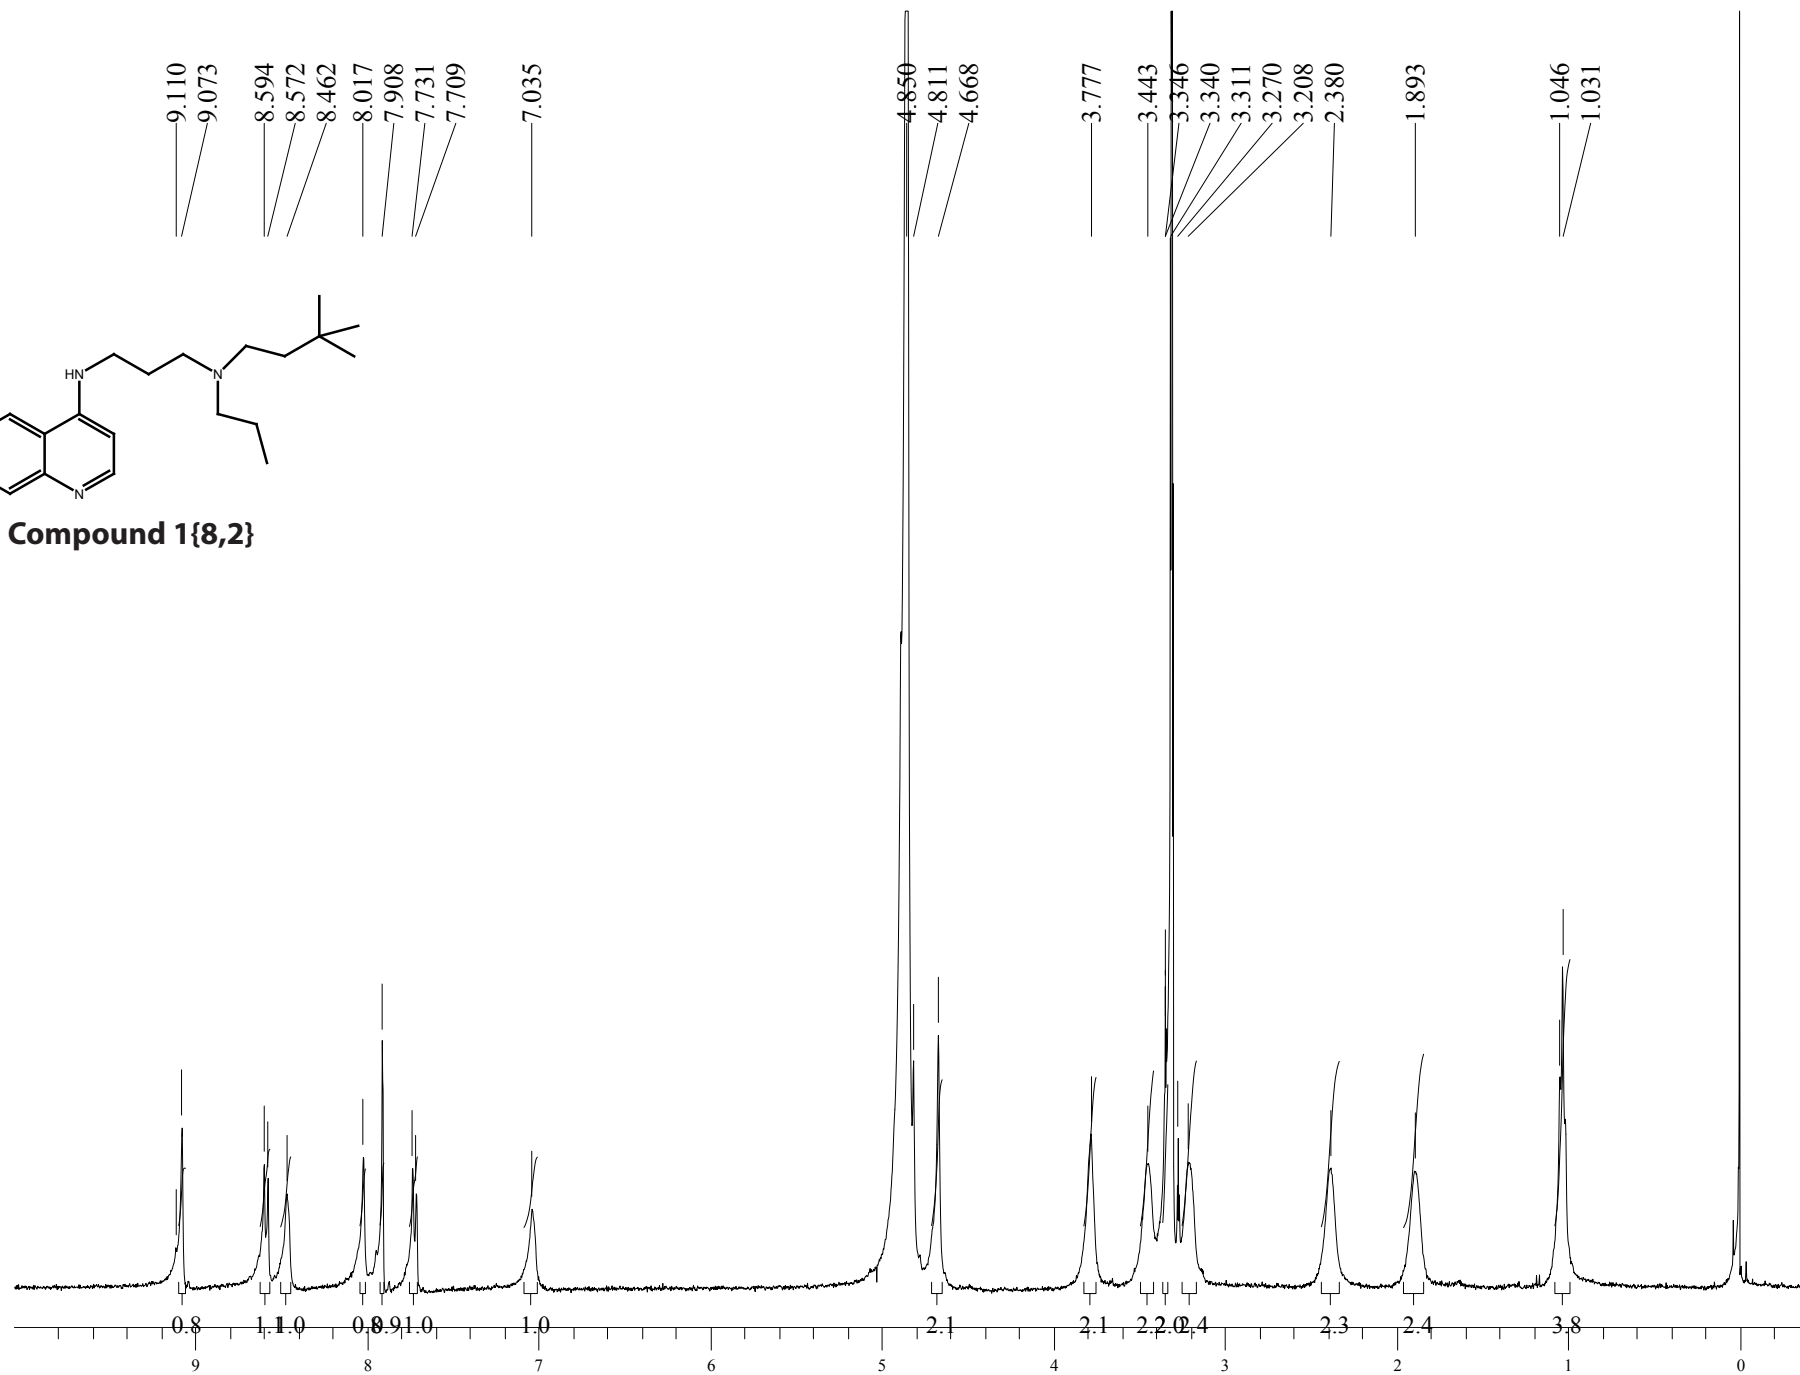

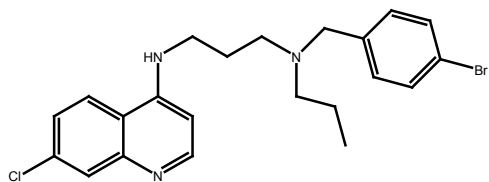

**Compound 1{14,2}**

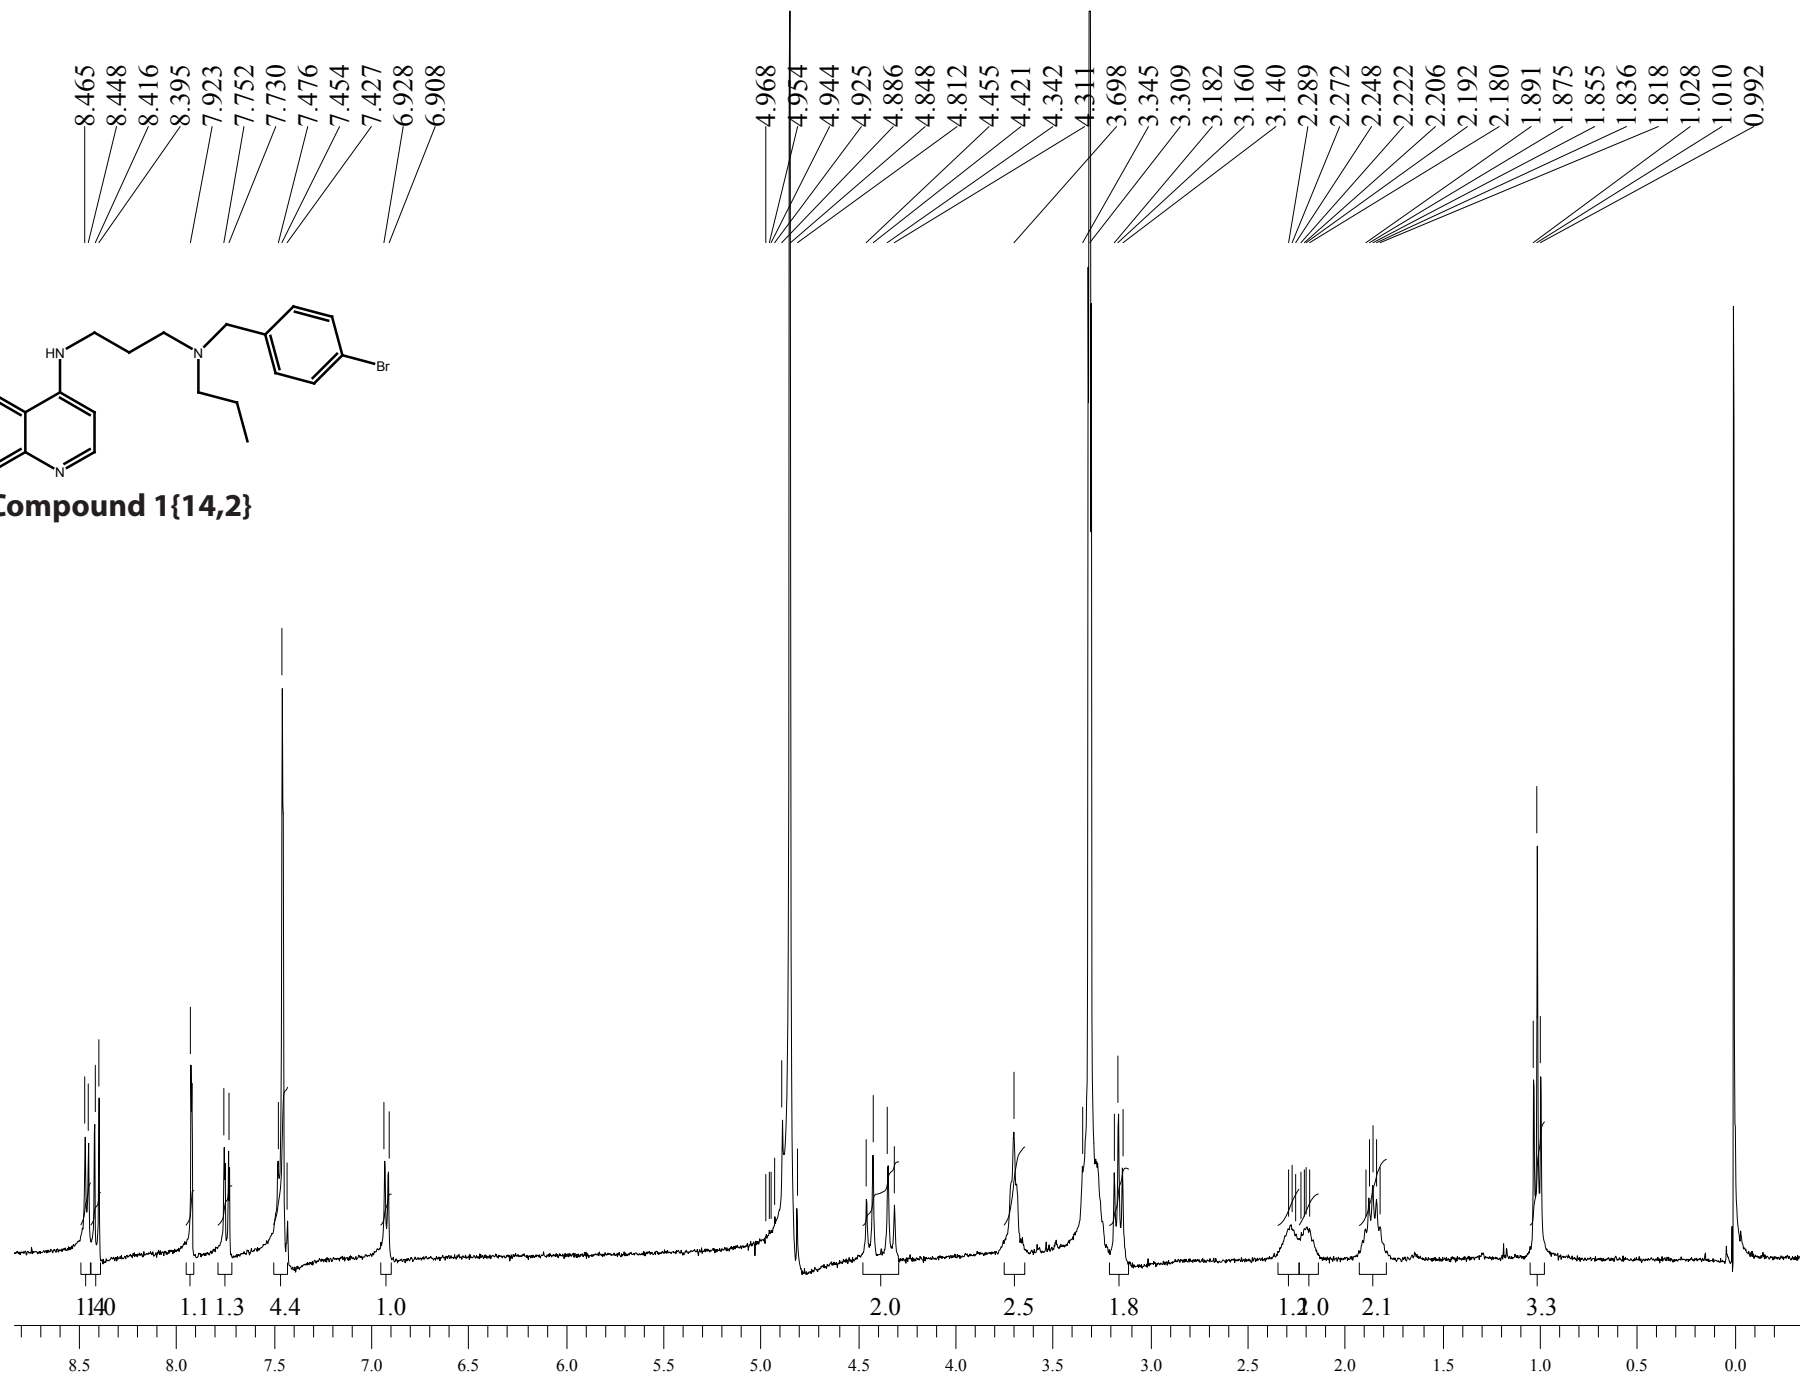

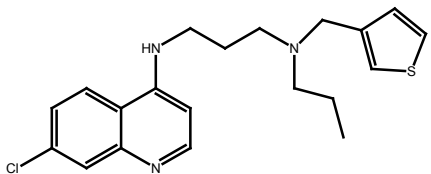

**Compound 1{22,2}**

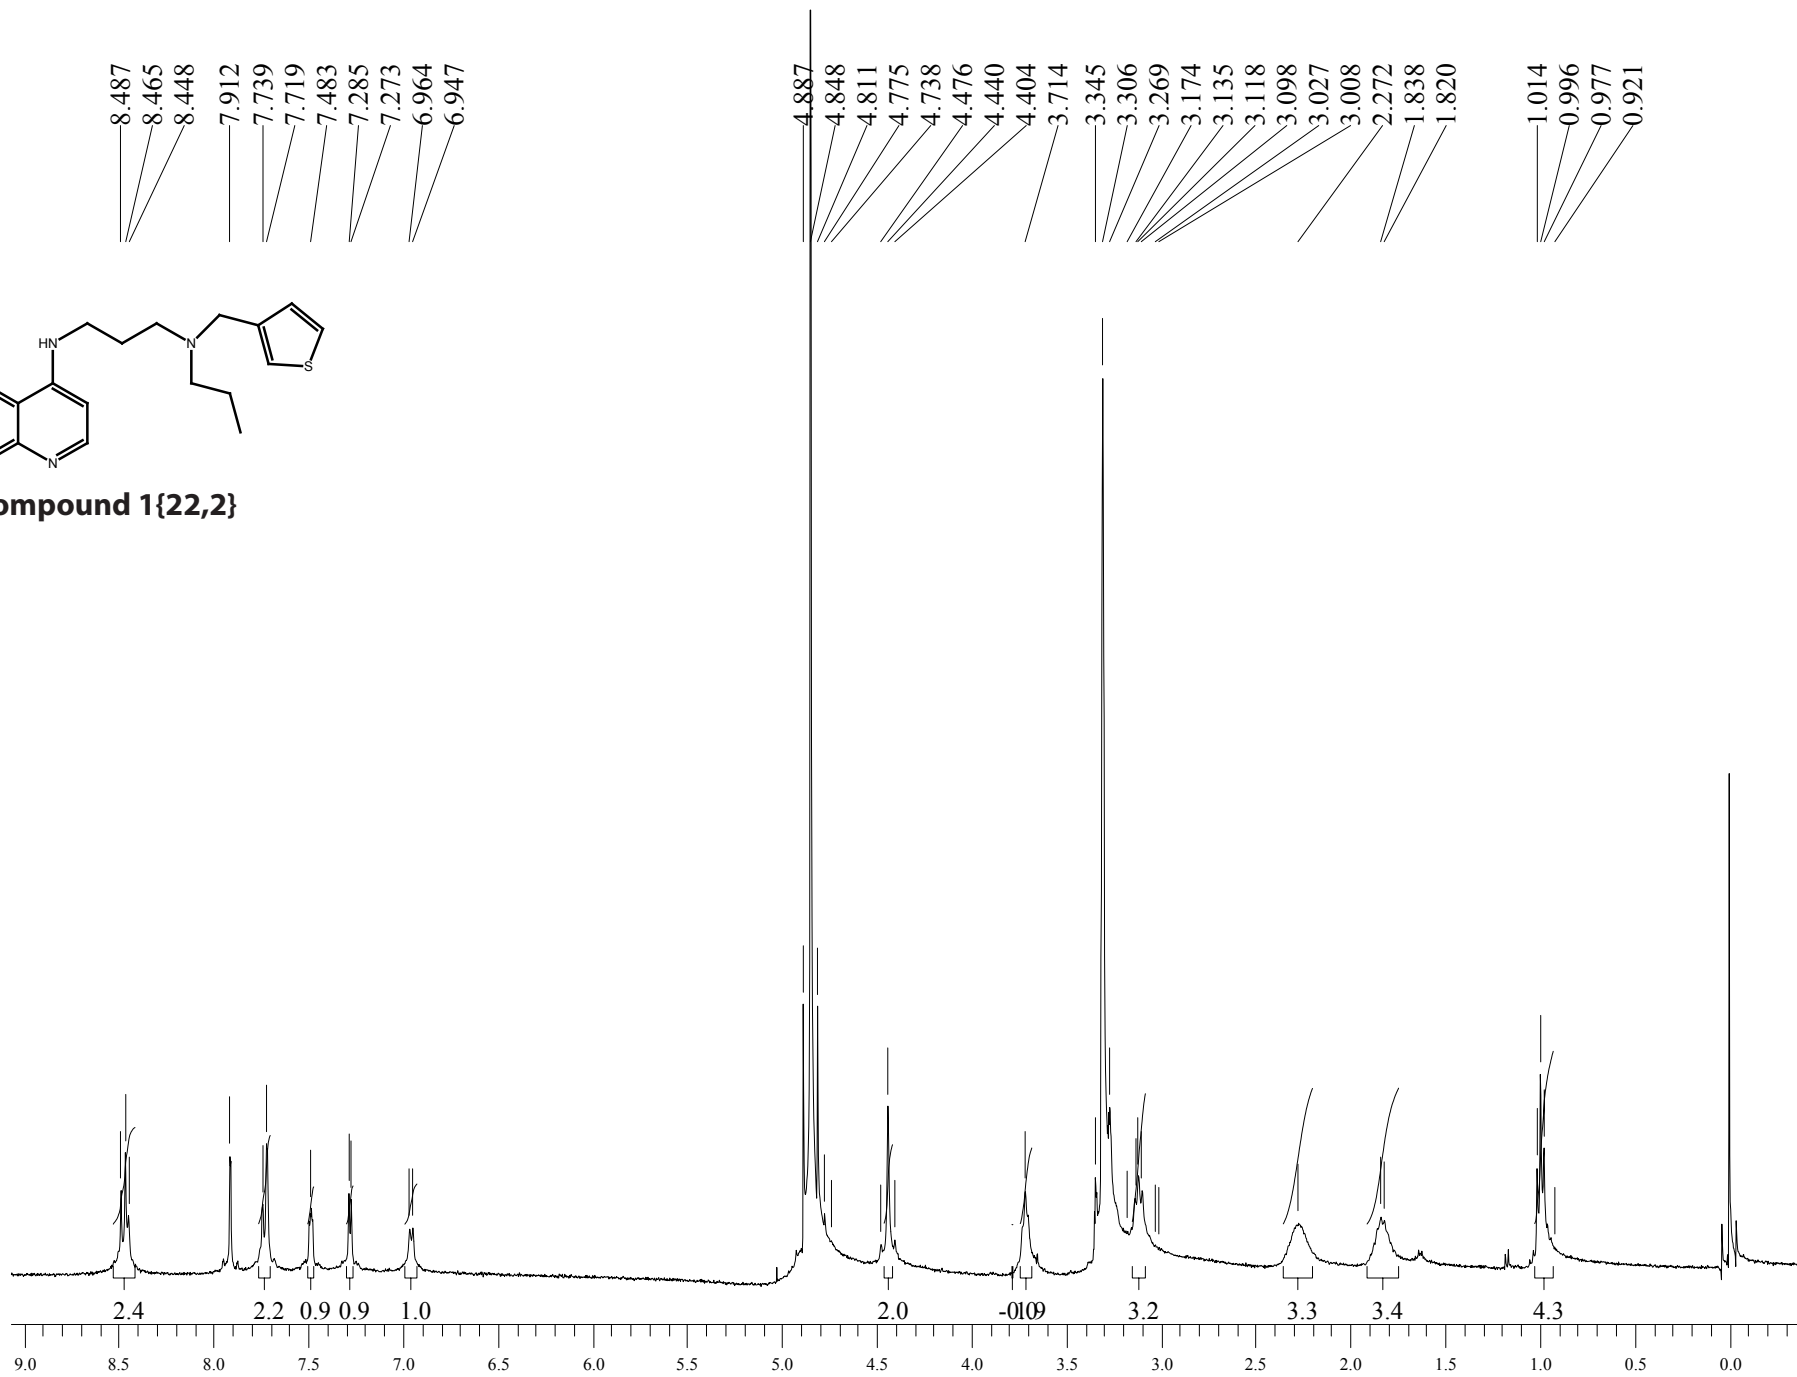

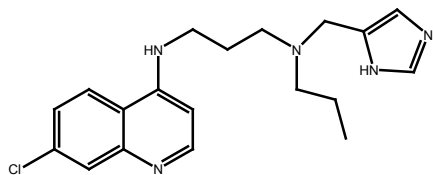

Compound 1{23,2}

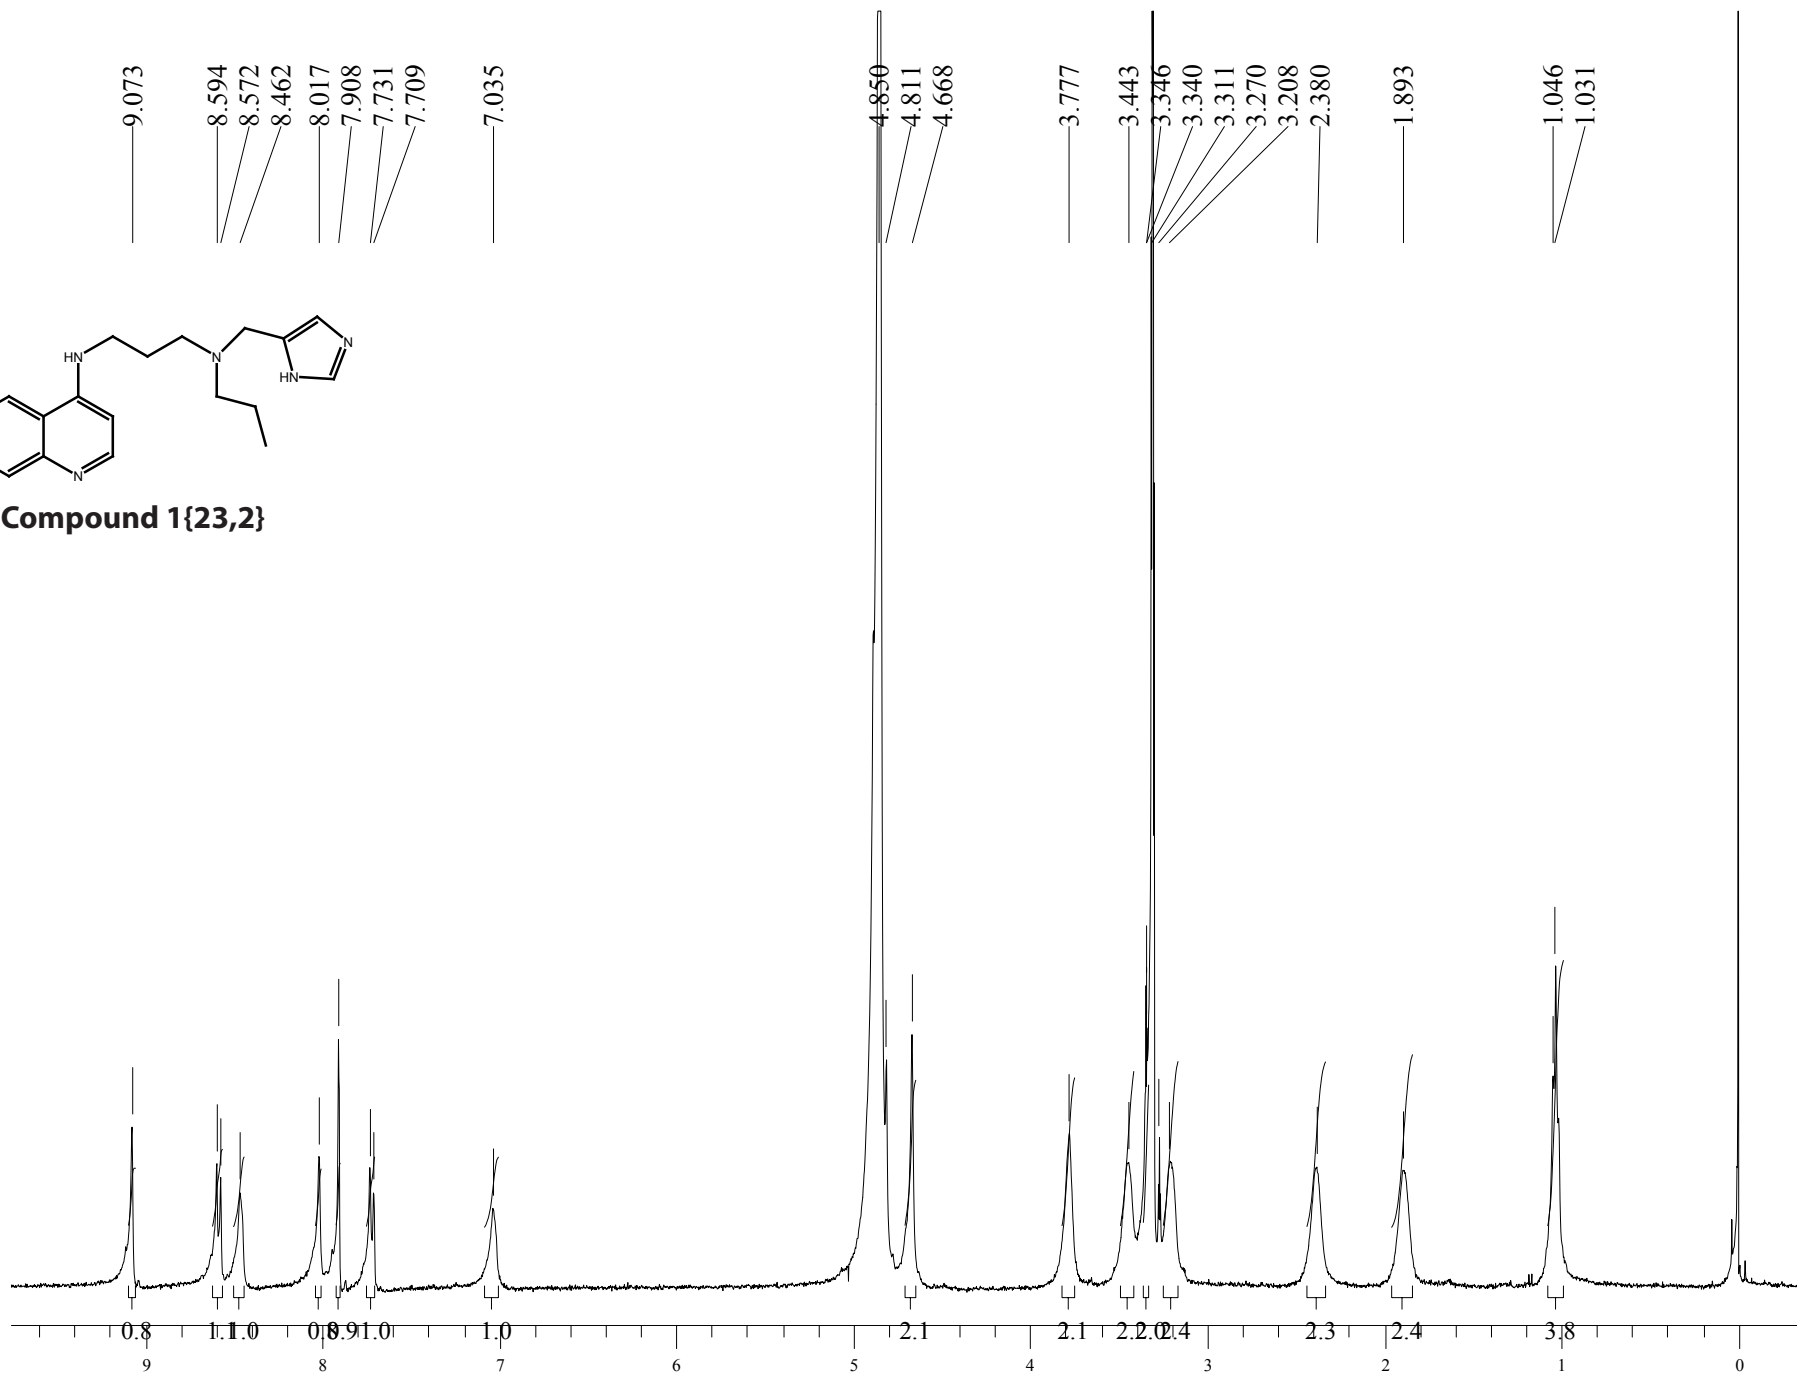



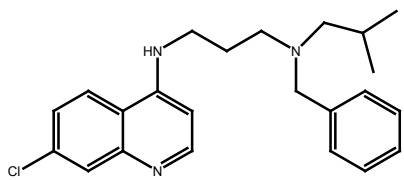

**Compound 1{3,13}**

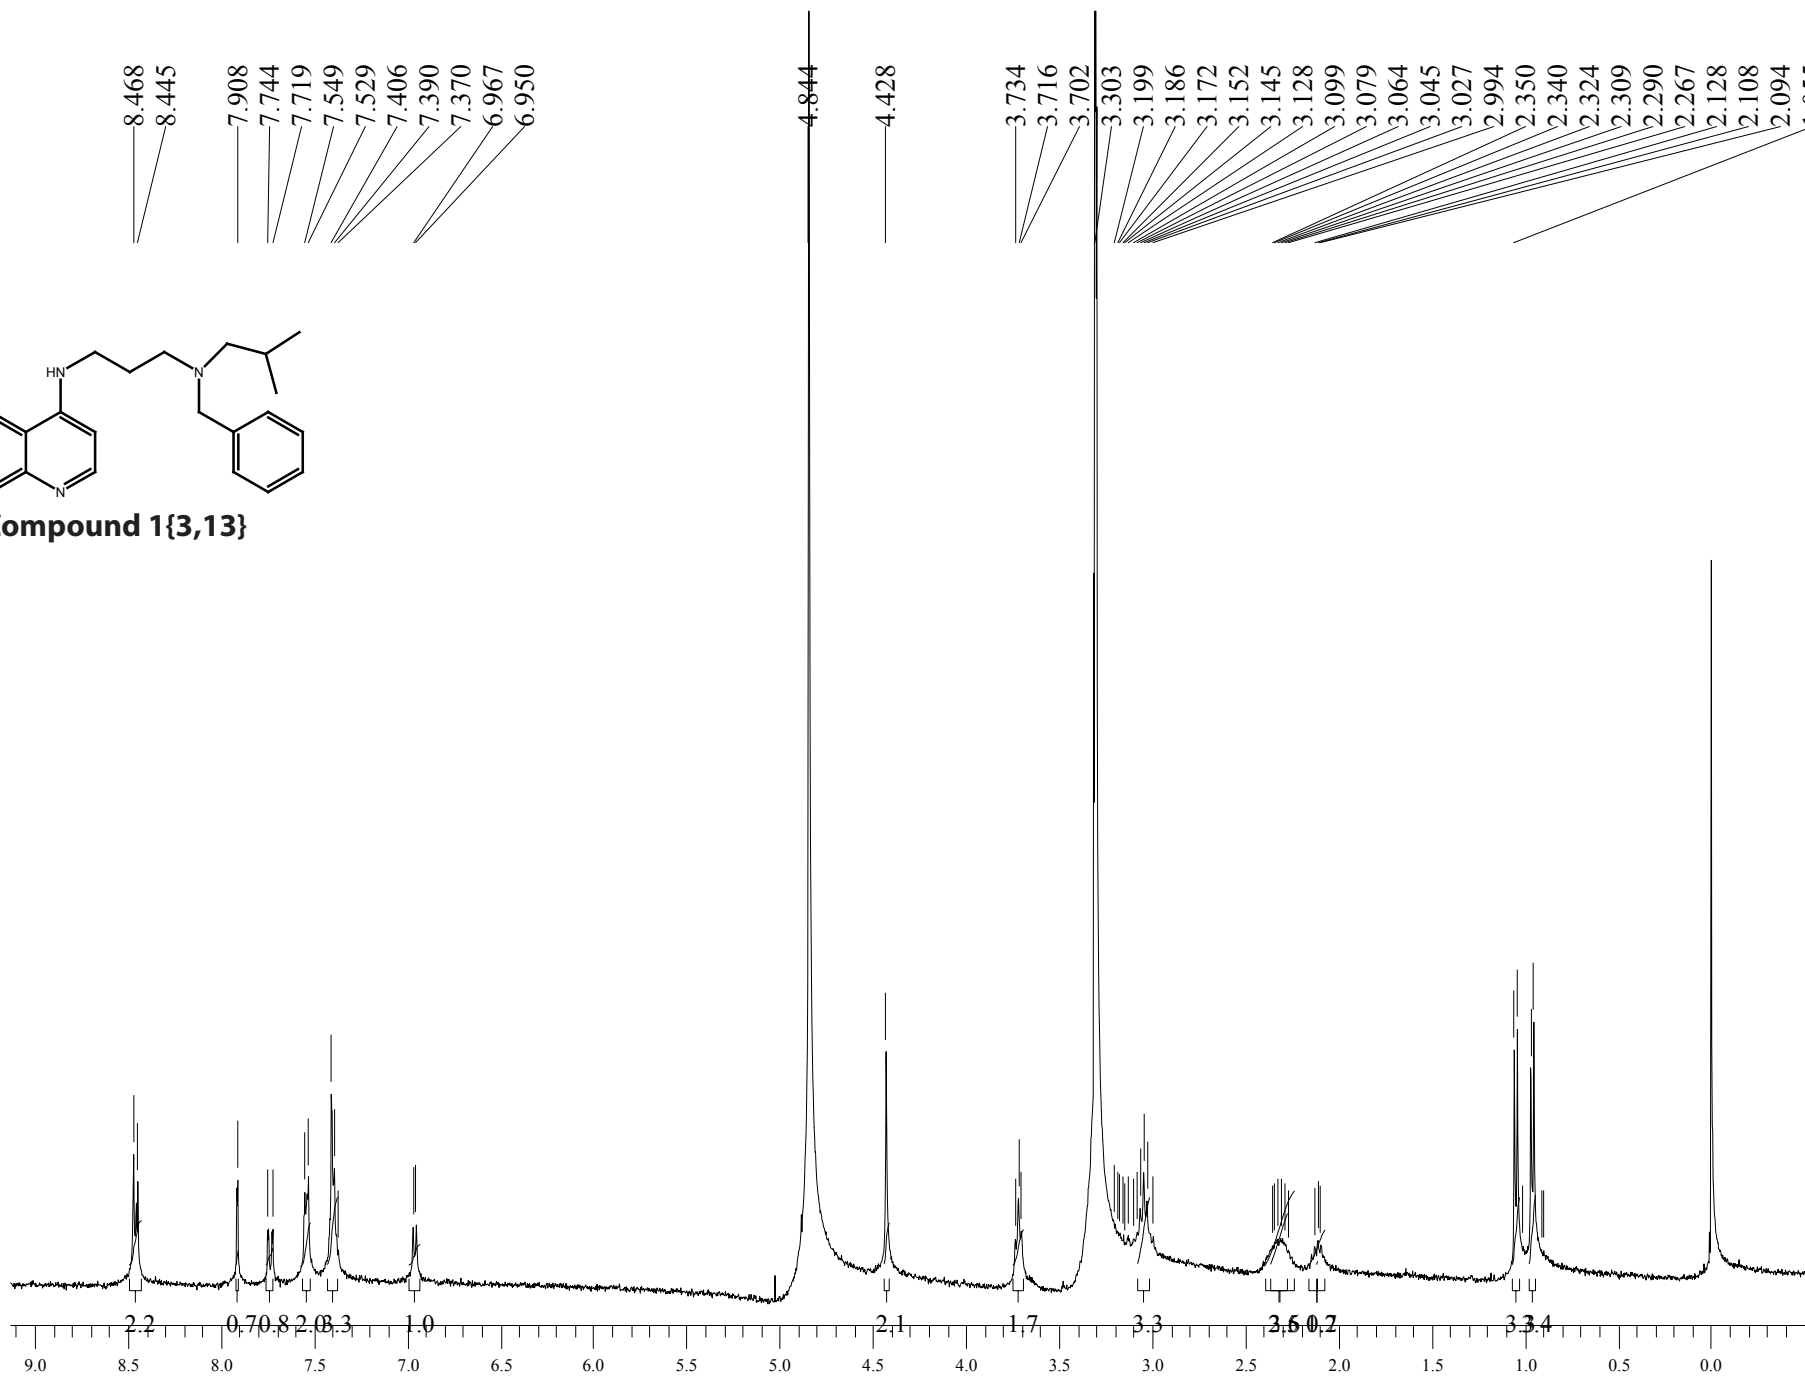

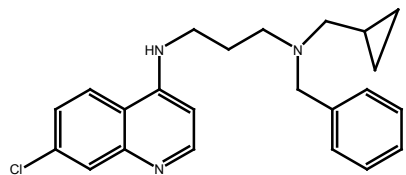

**Compound 1{4,13}**

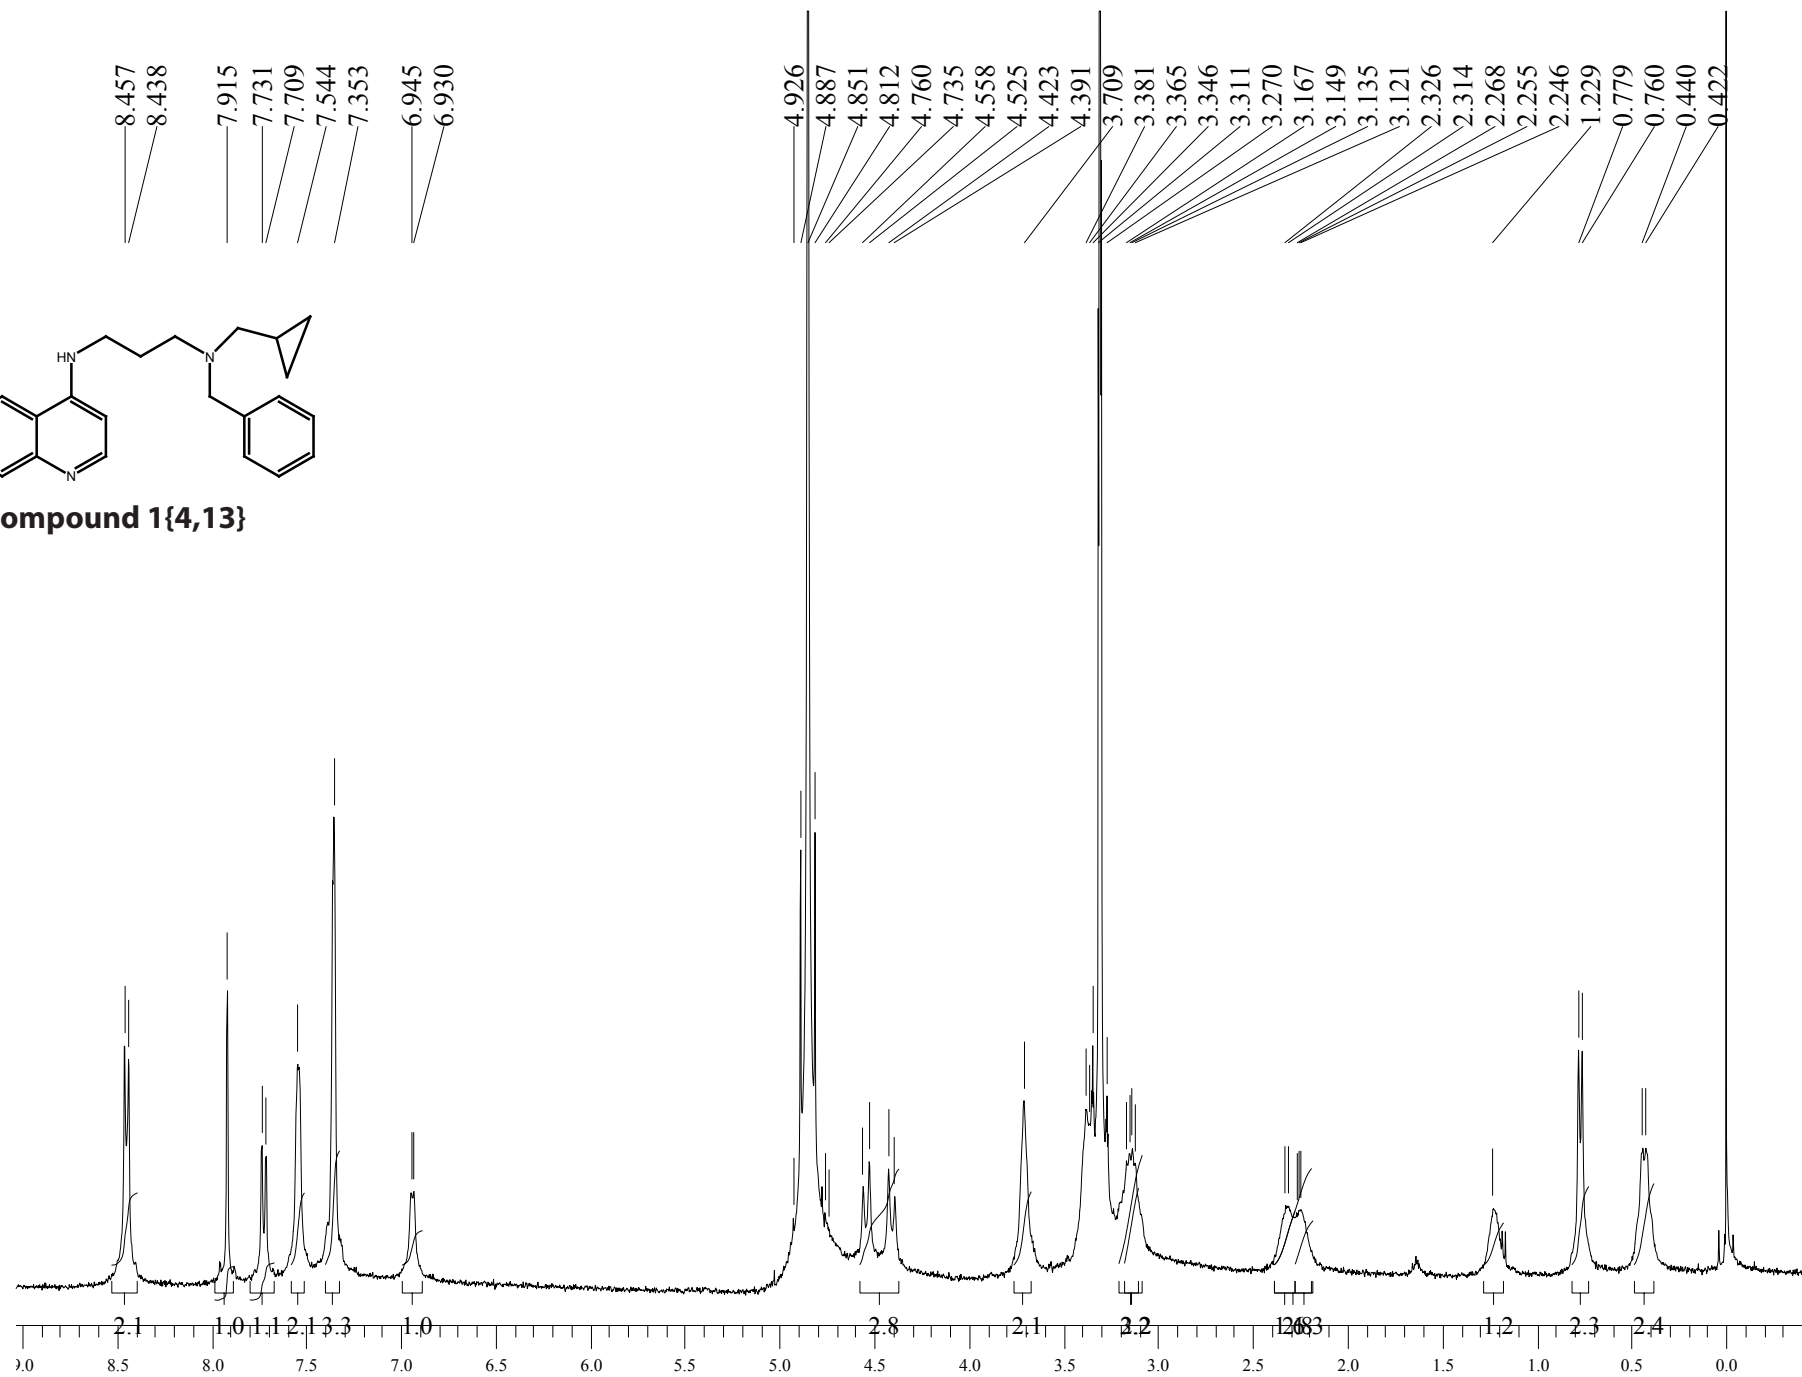

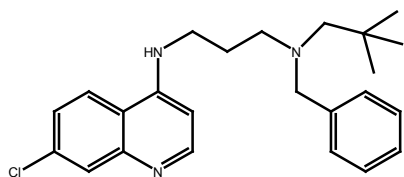

**Compound 1{5,13}**

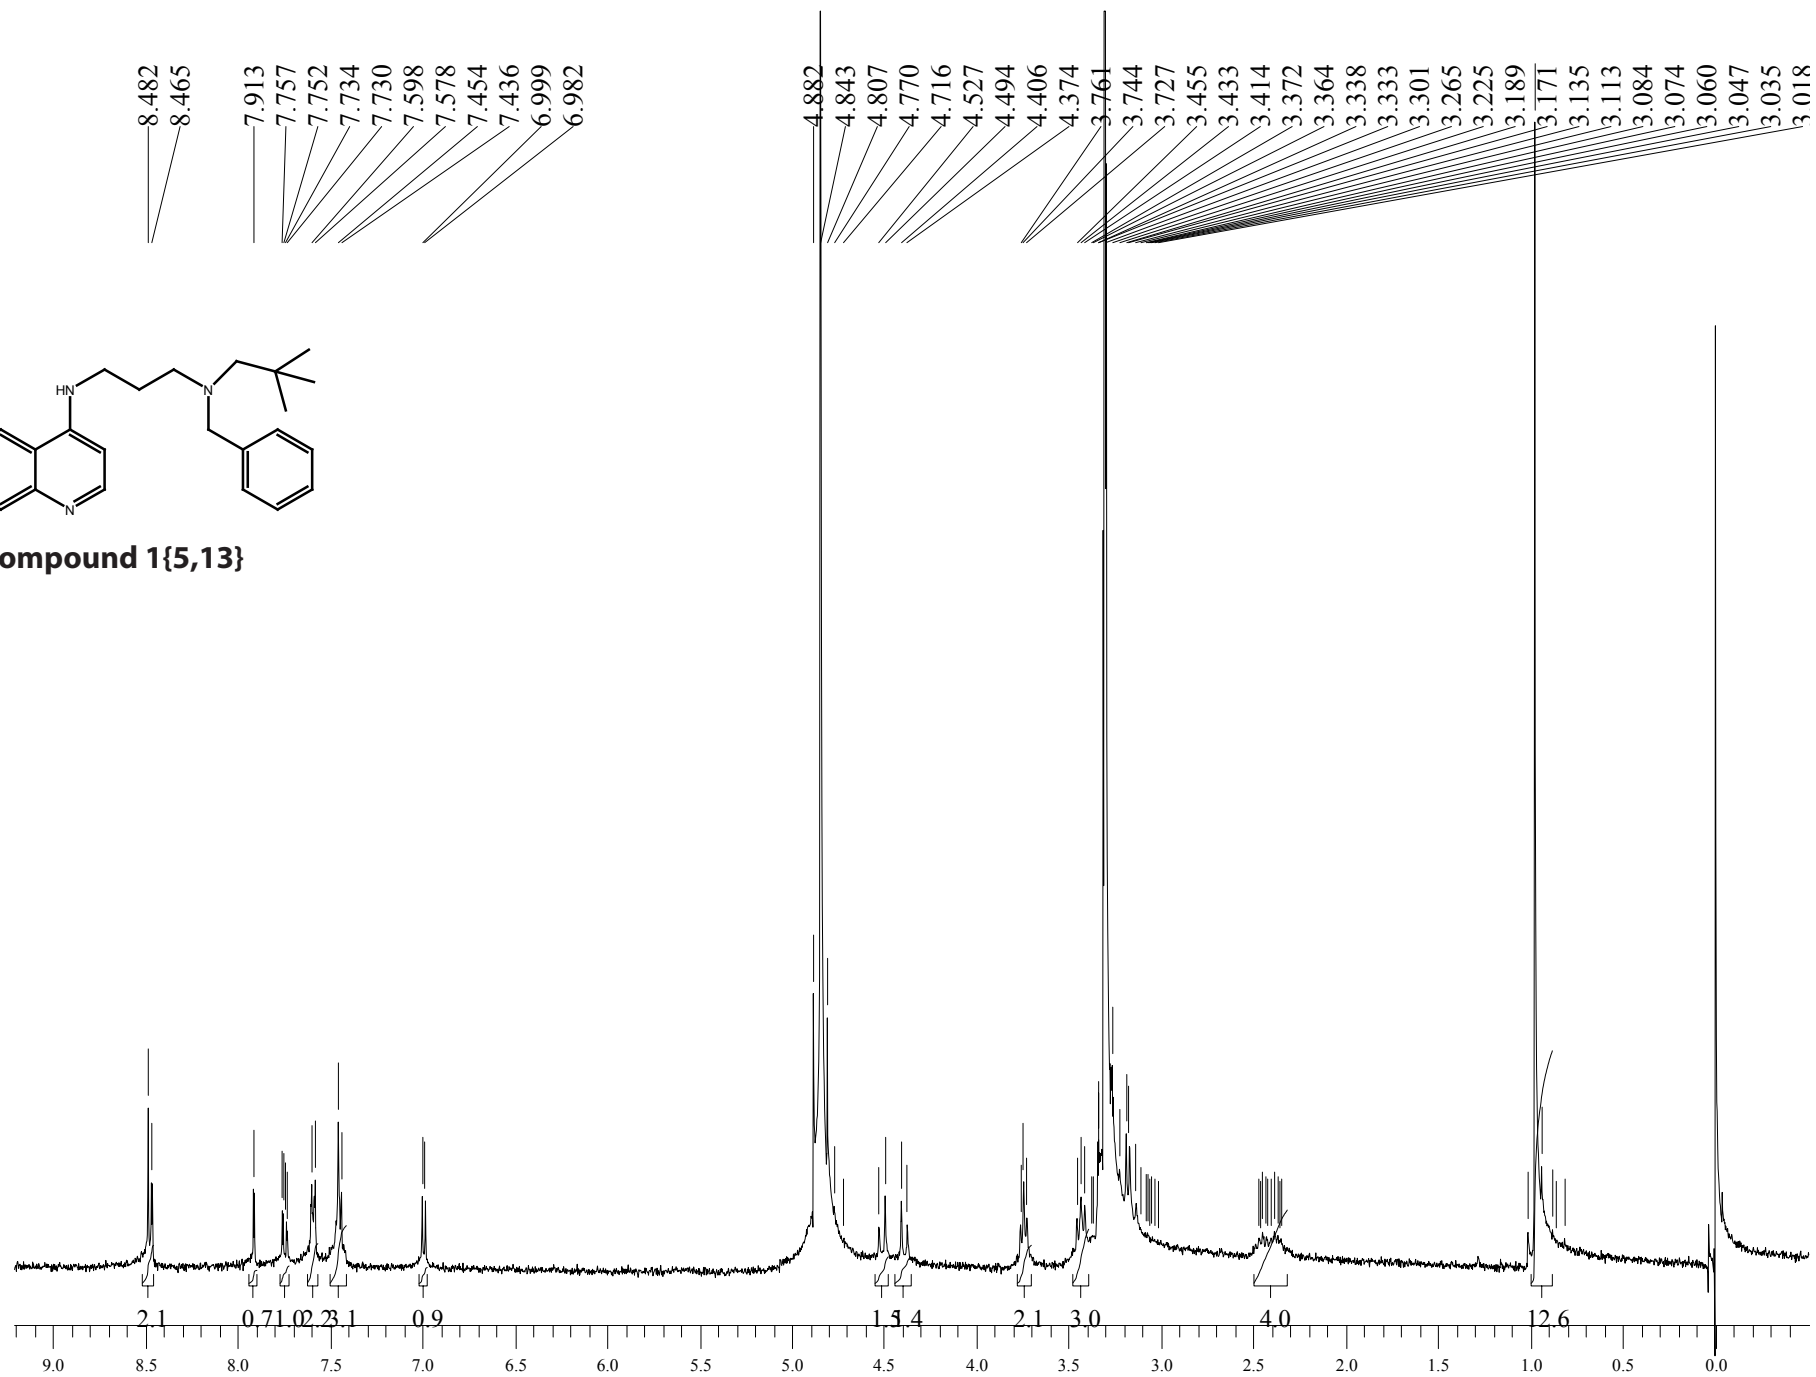

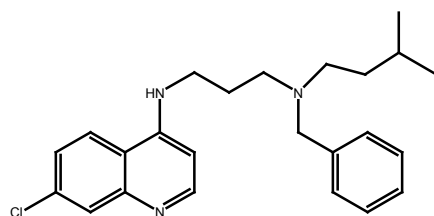

**Compound 1{7,13}**

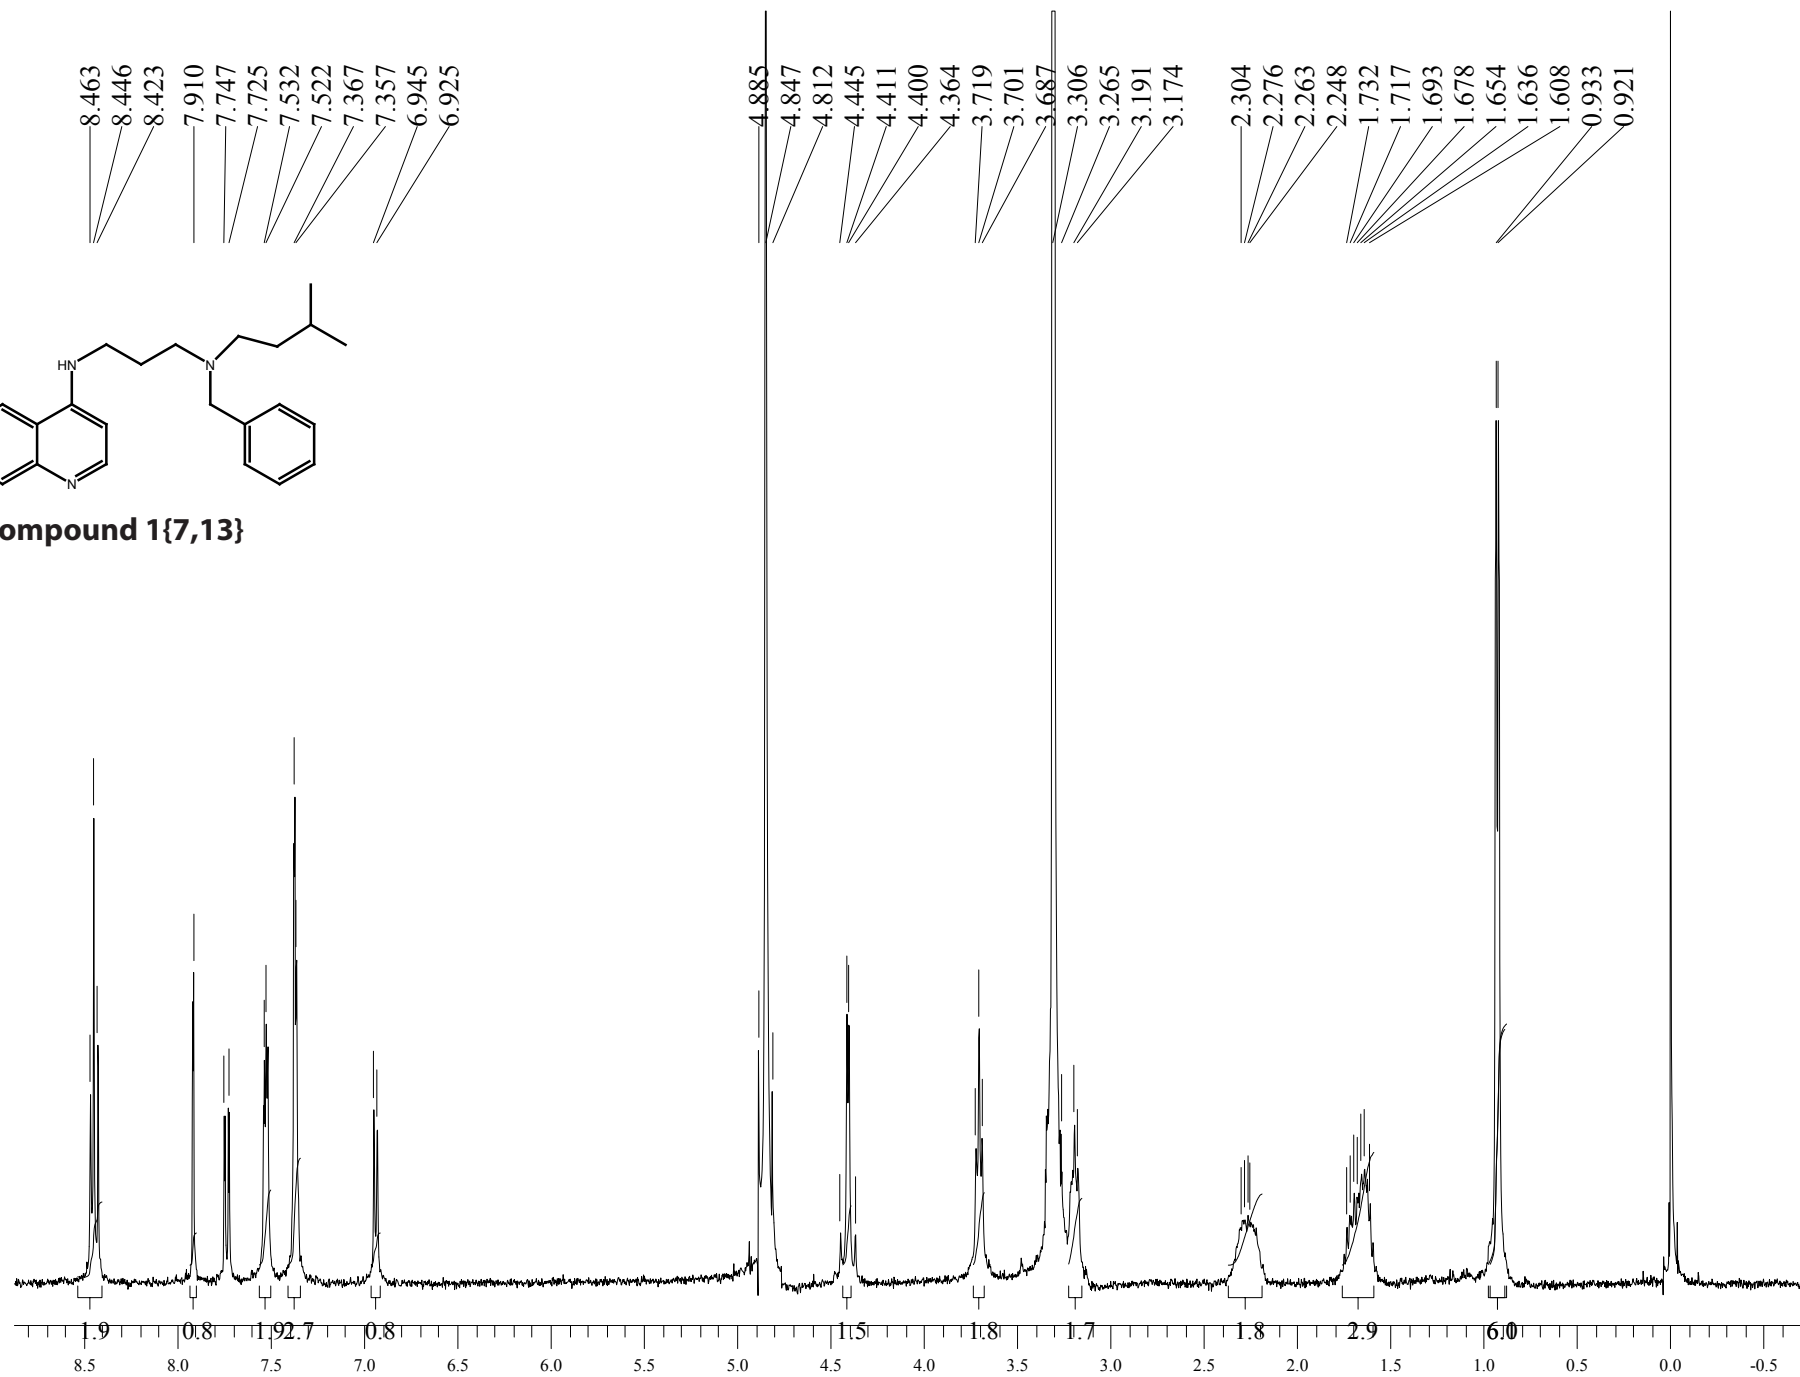

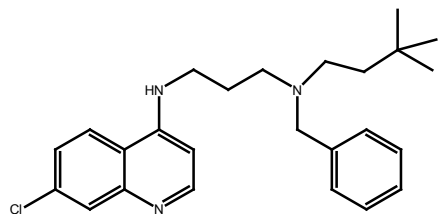

**Compound 1{8,13}**

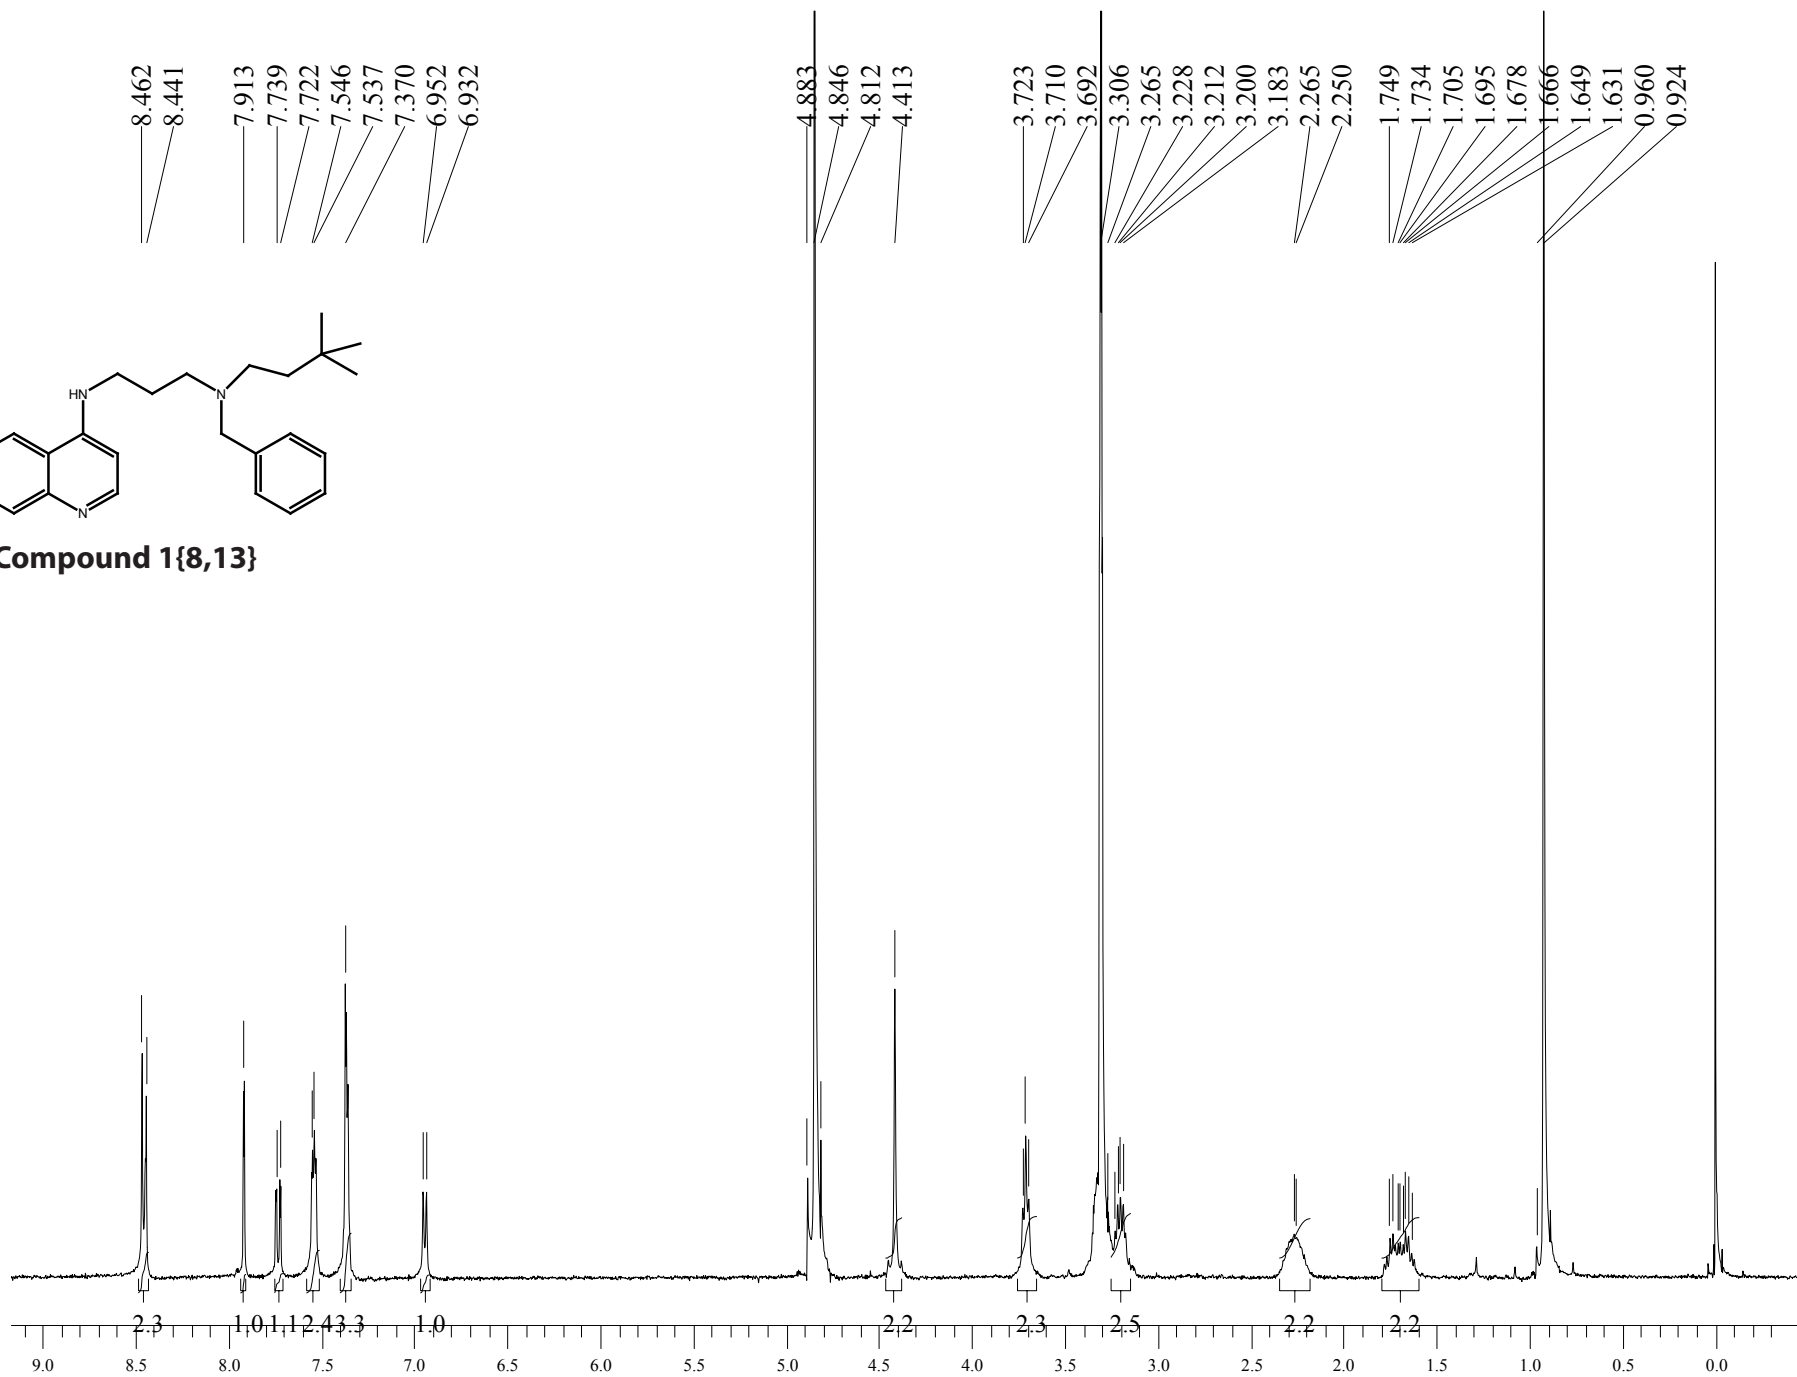

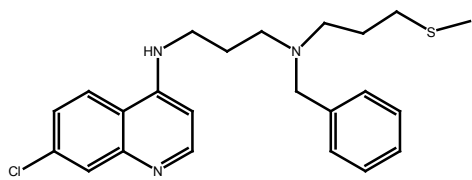

**Compound 1{9,13}**

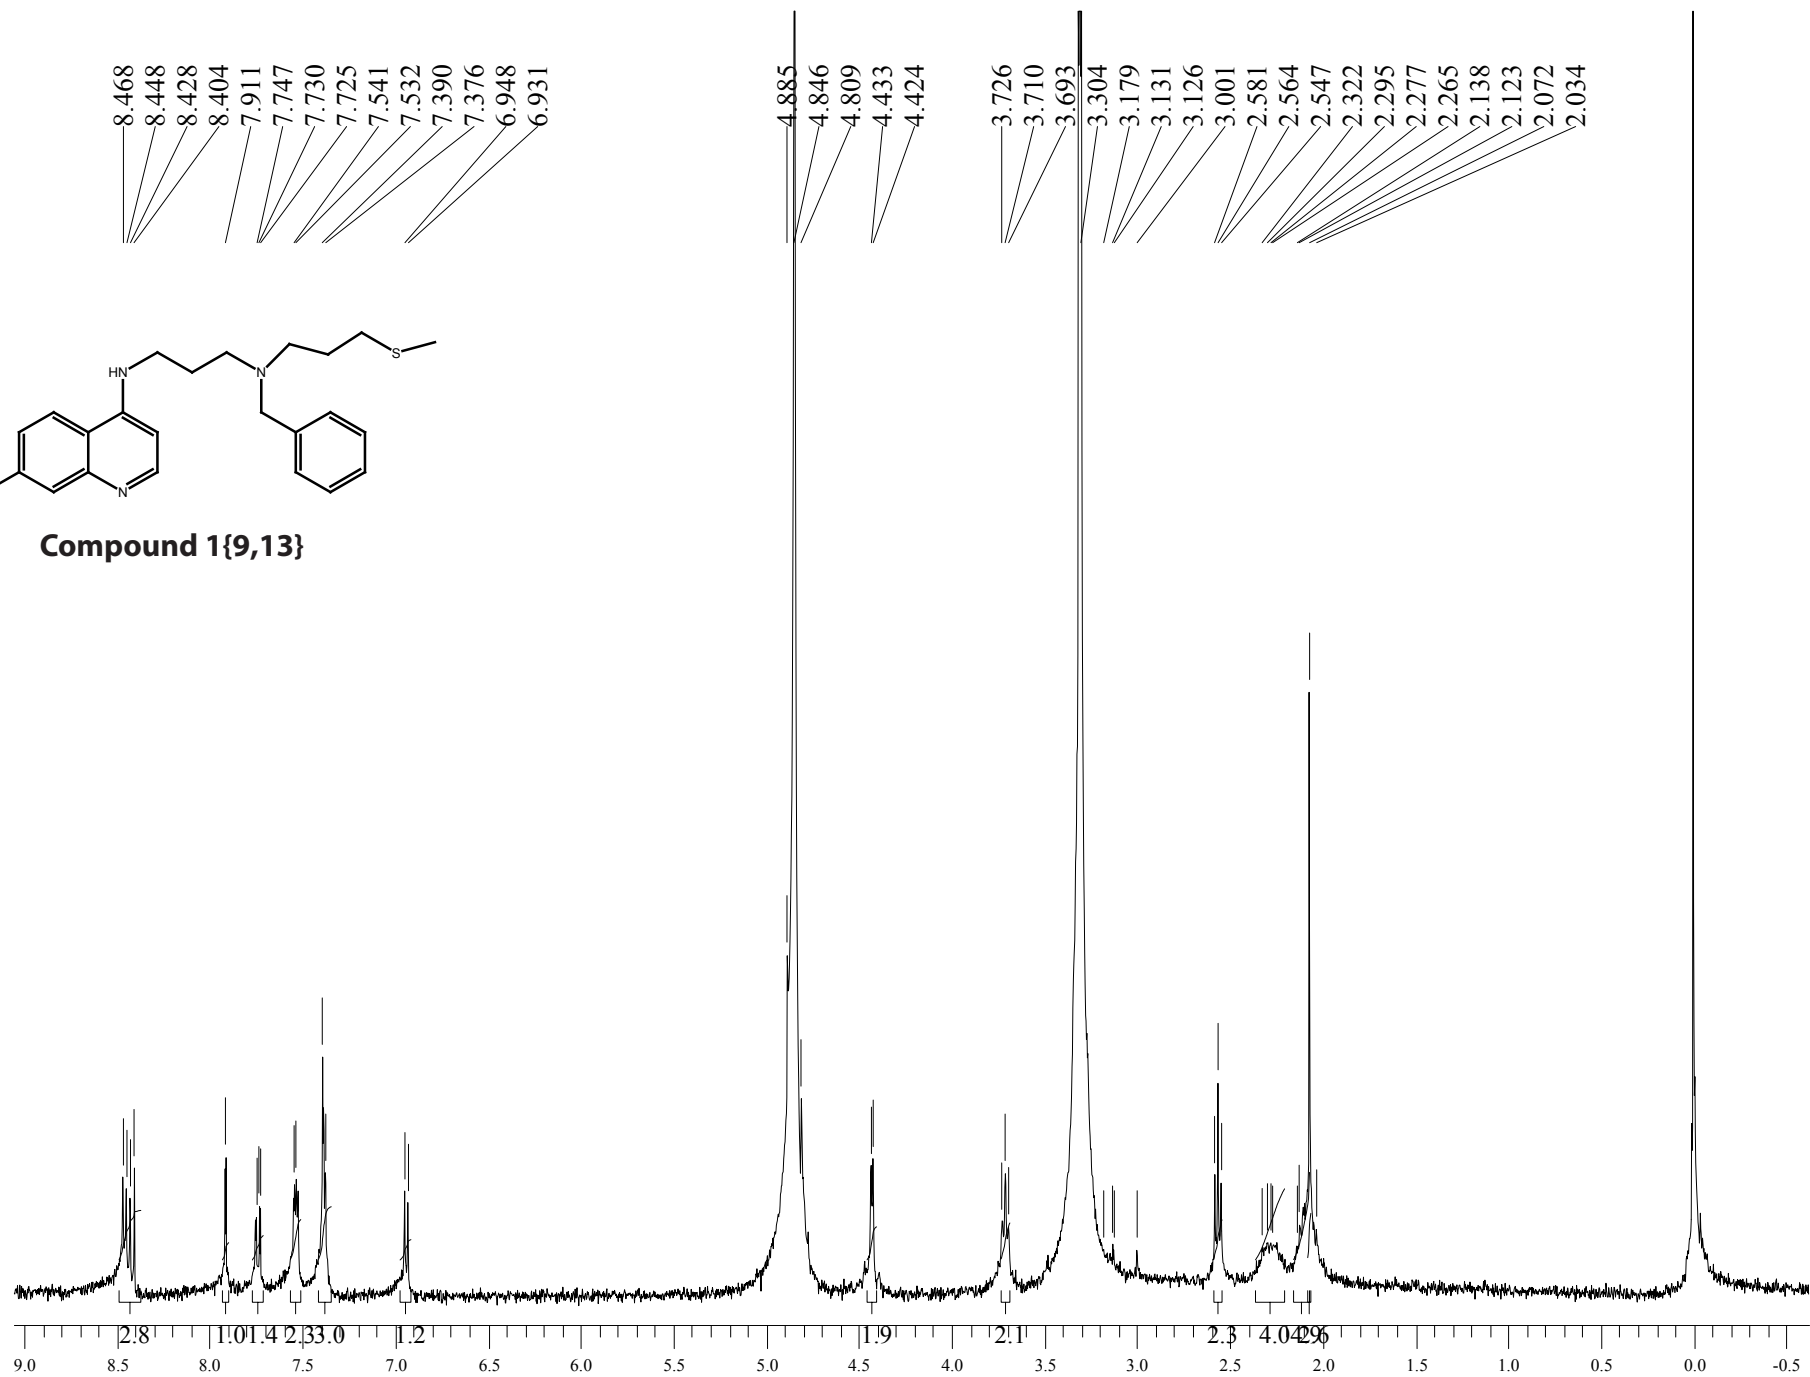

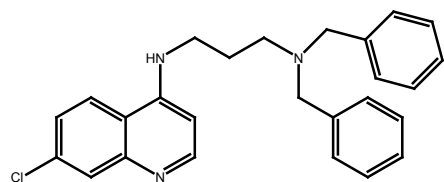

**Compound 1{13,13}**

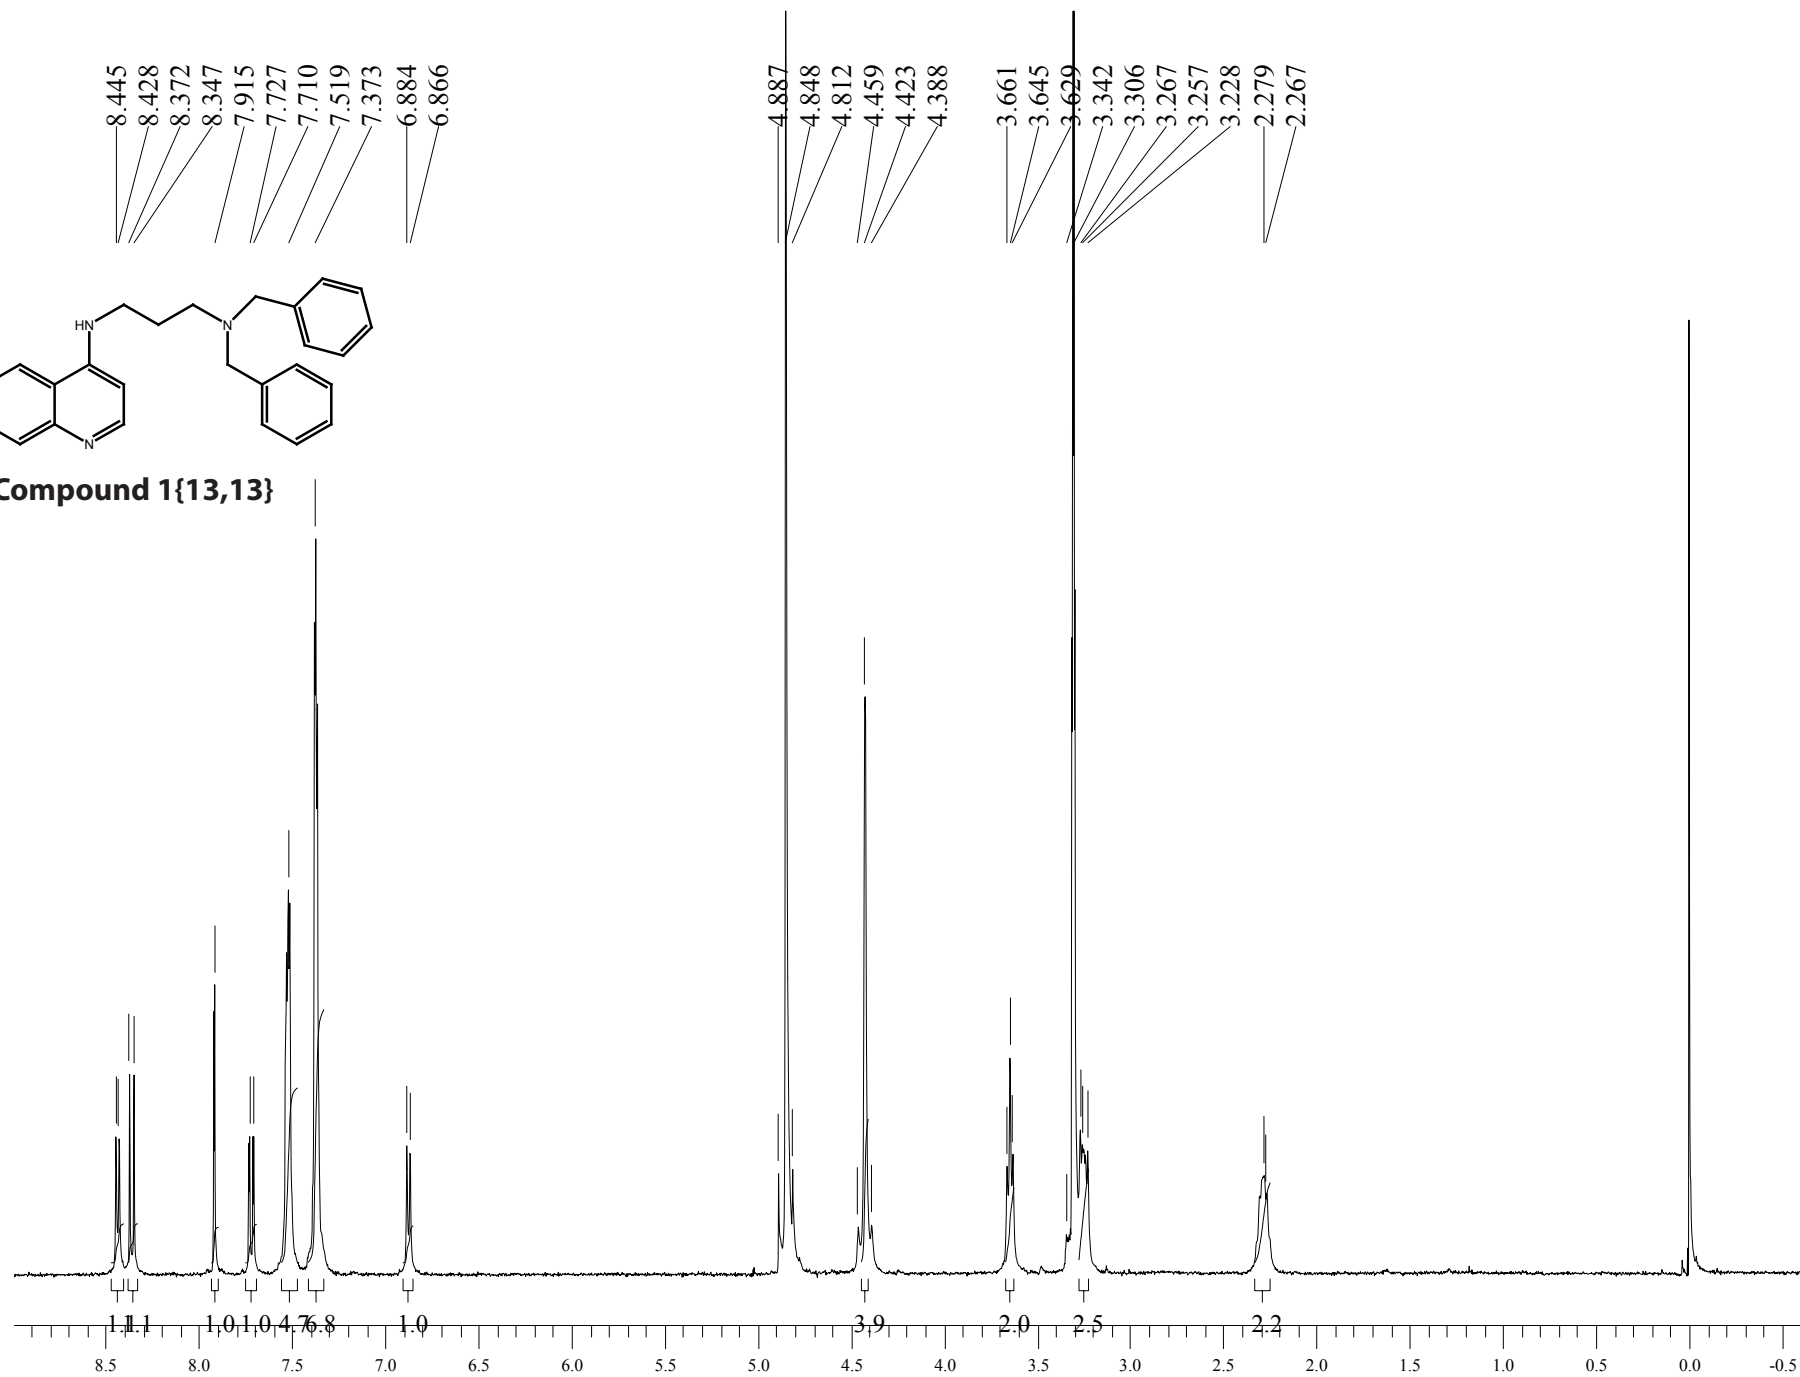

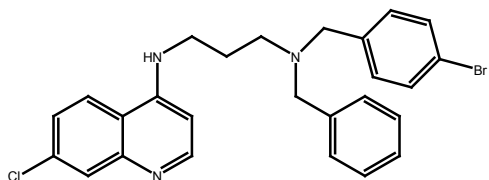

Compound 1{14,13}

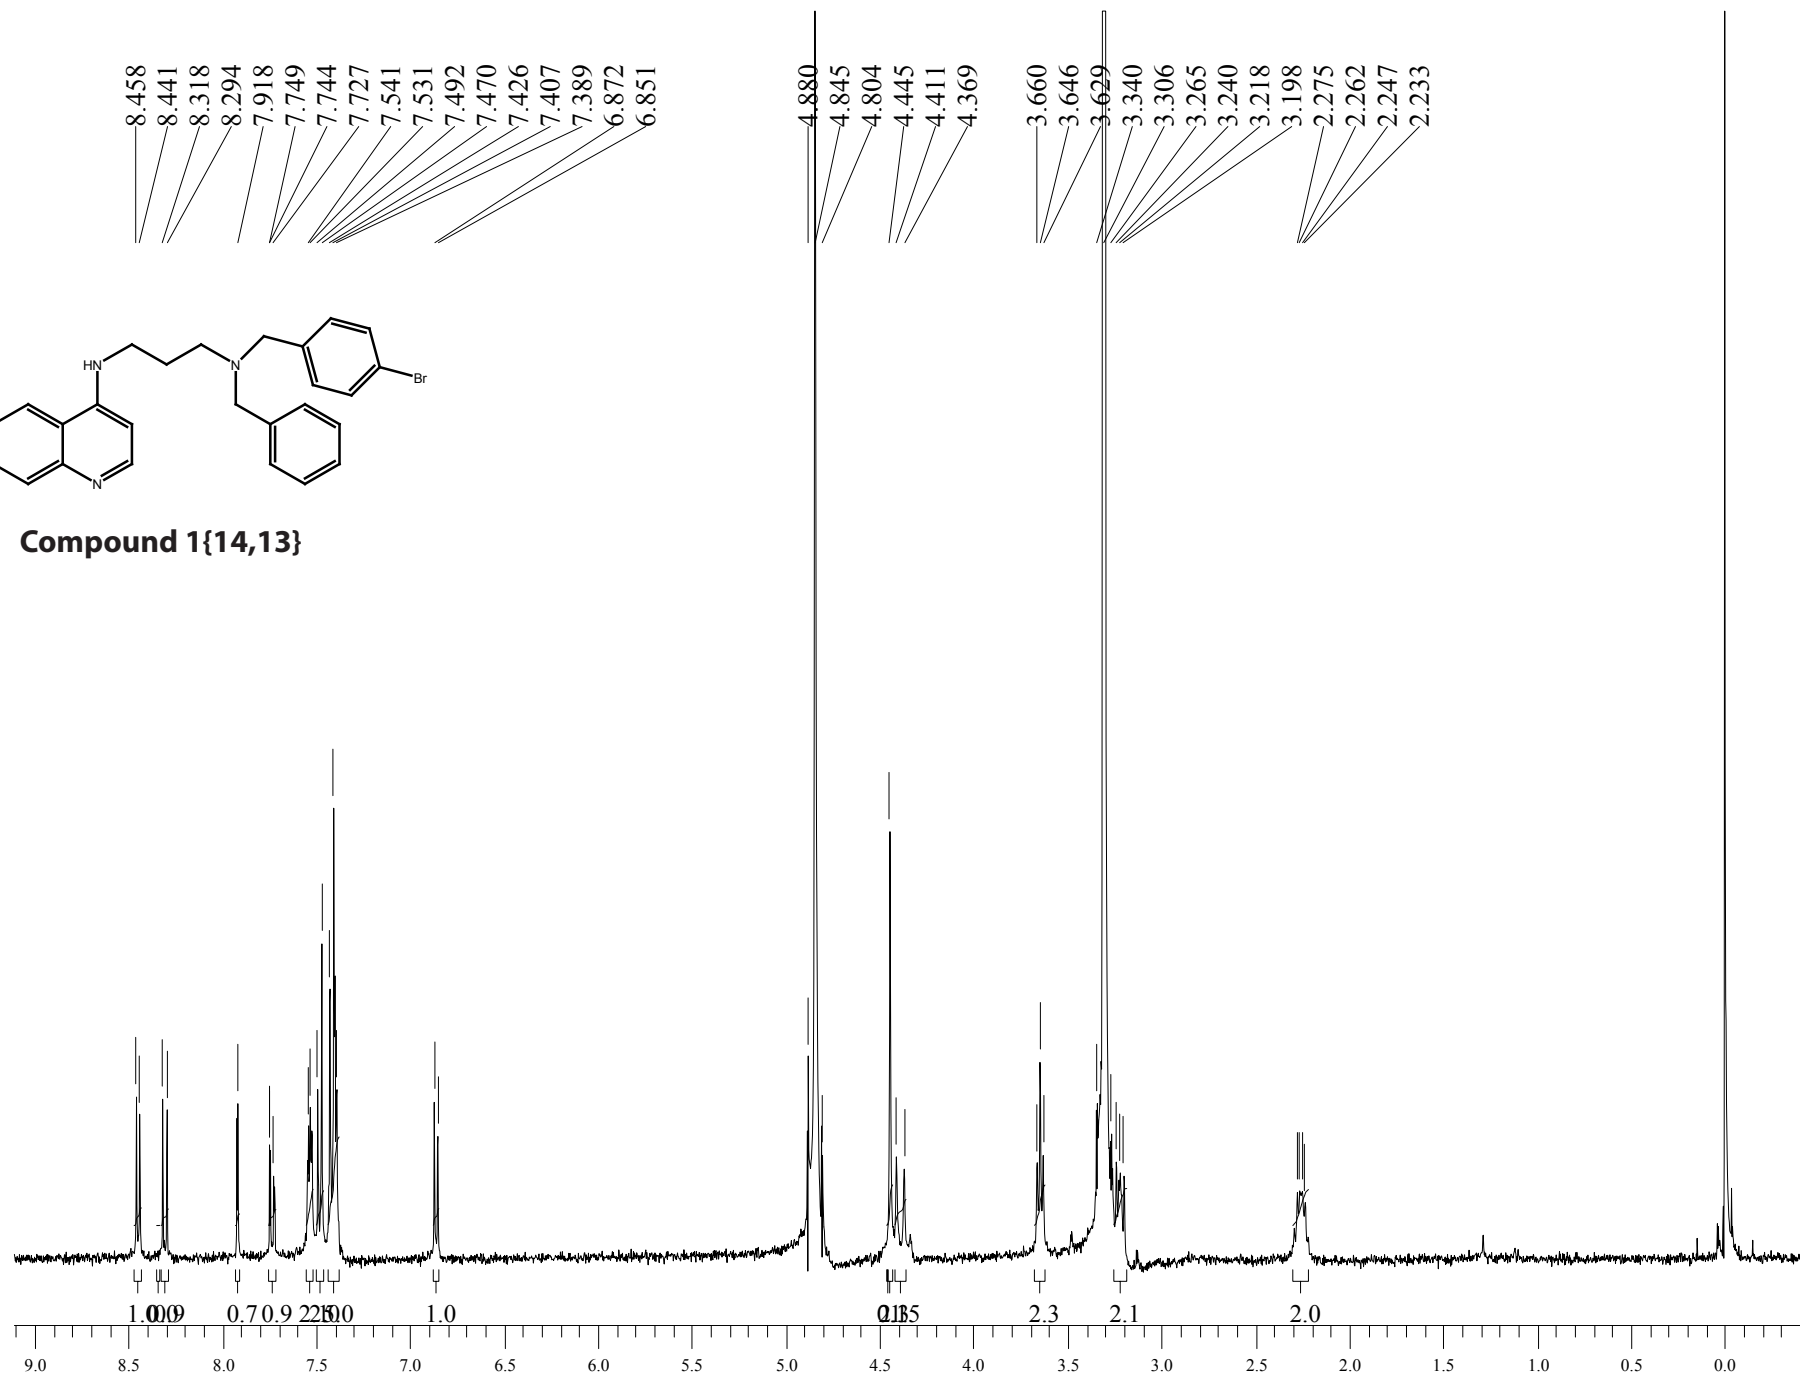



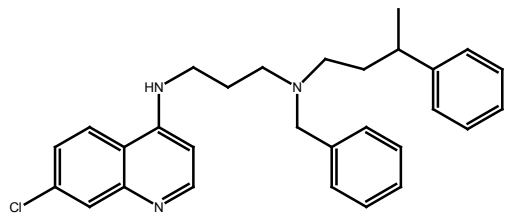

**Compound 1{18,13}**

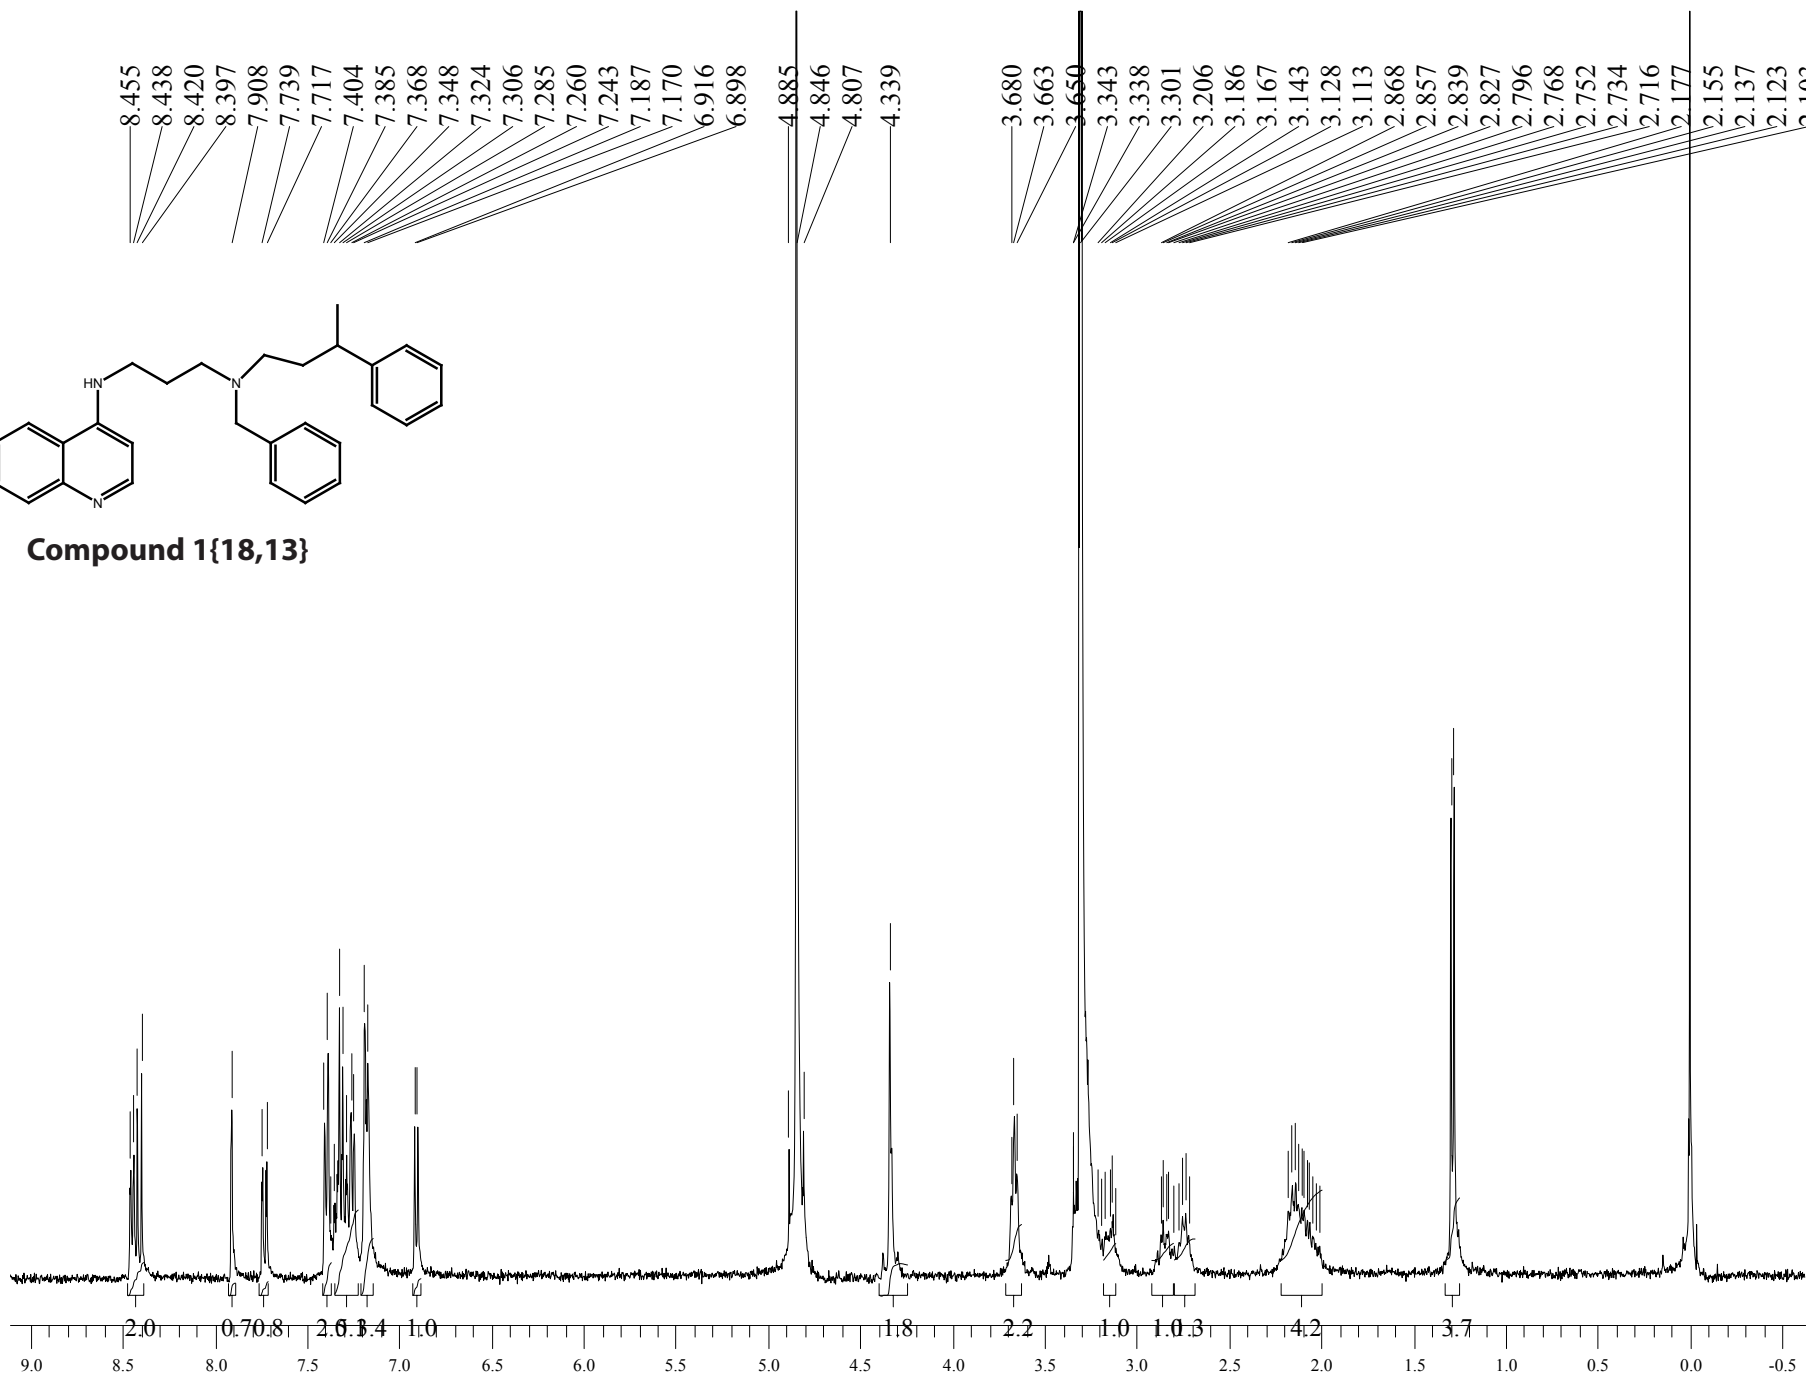

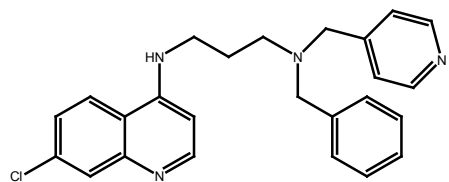

**Compound 1{20,13}**

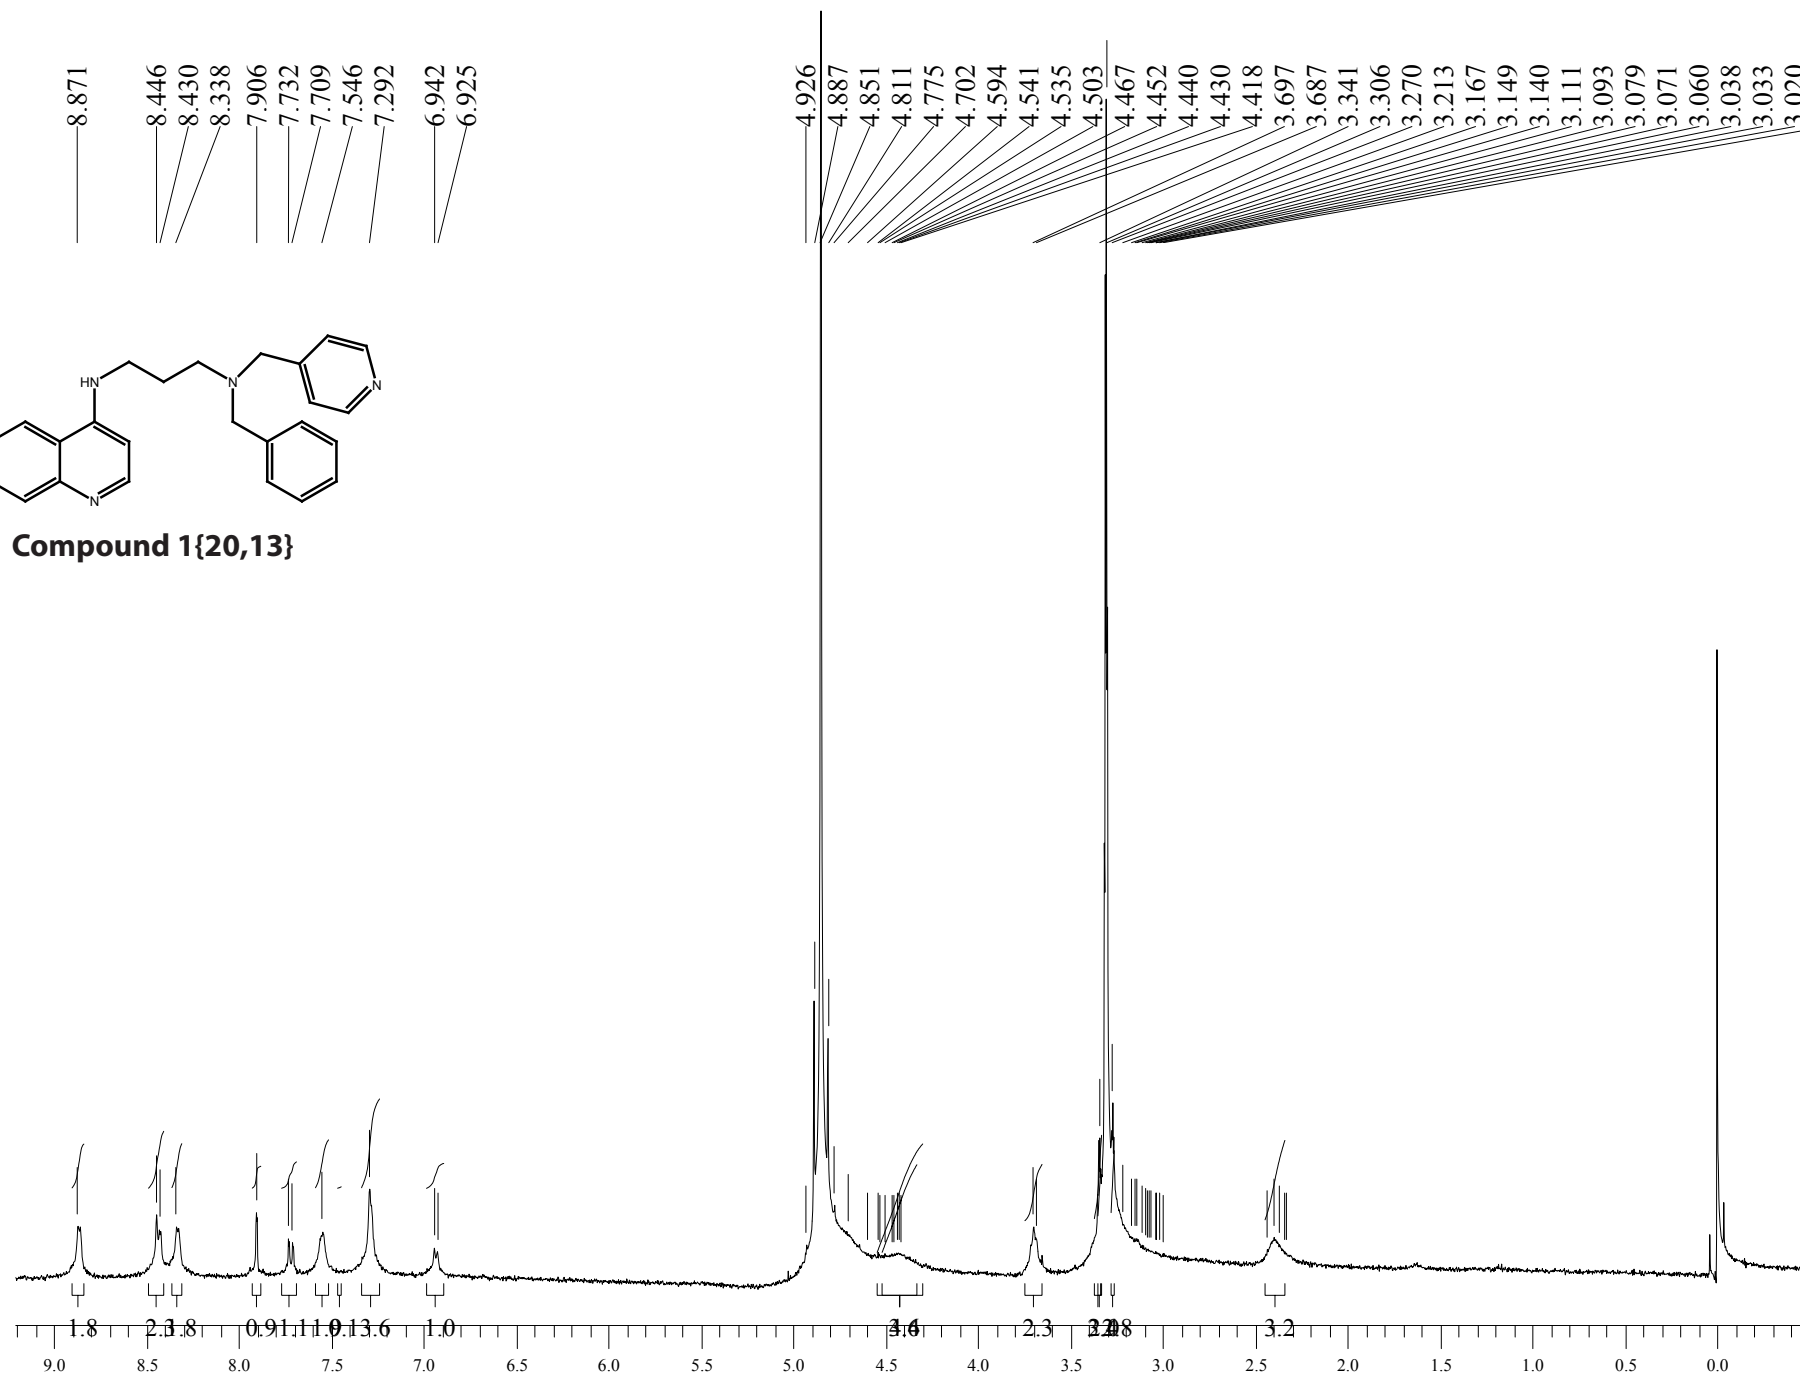

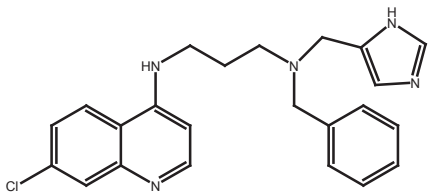

Compound 1{23,13}

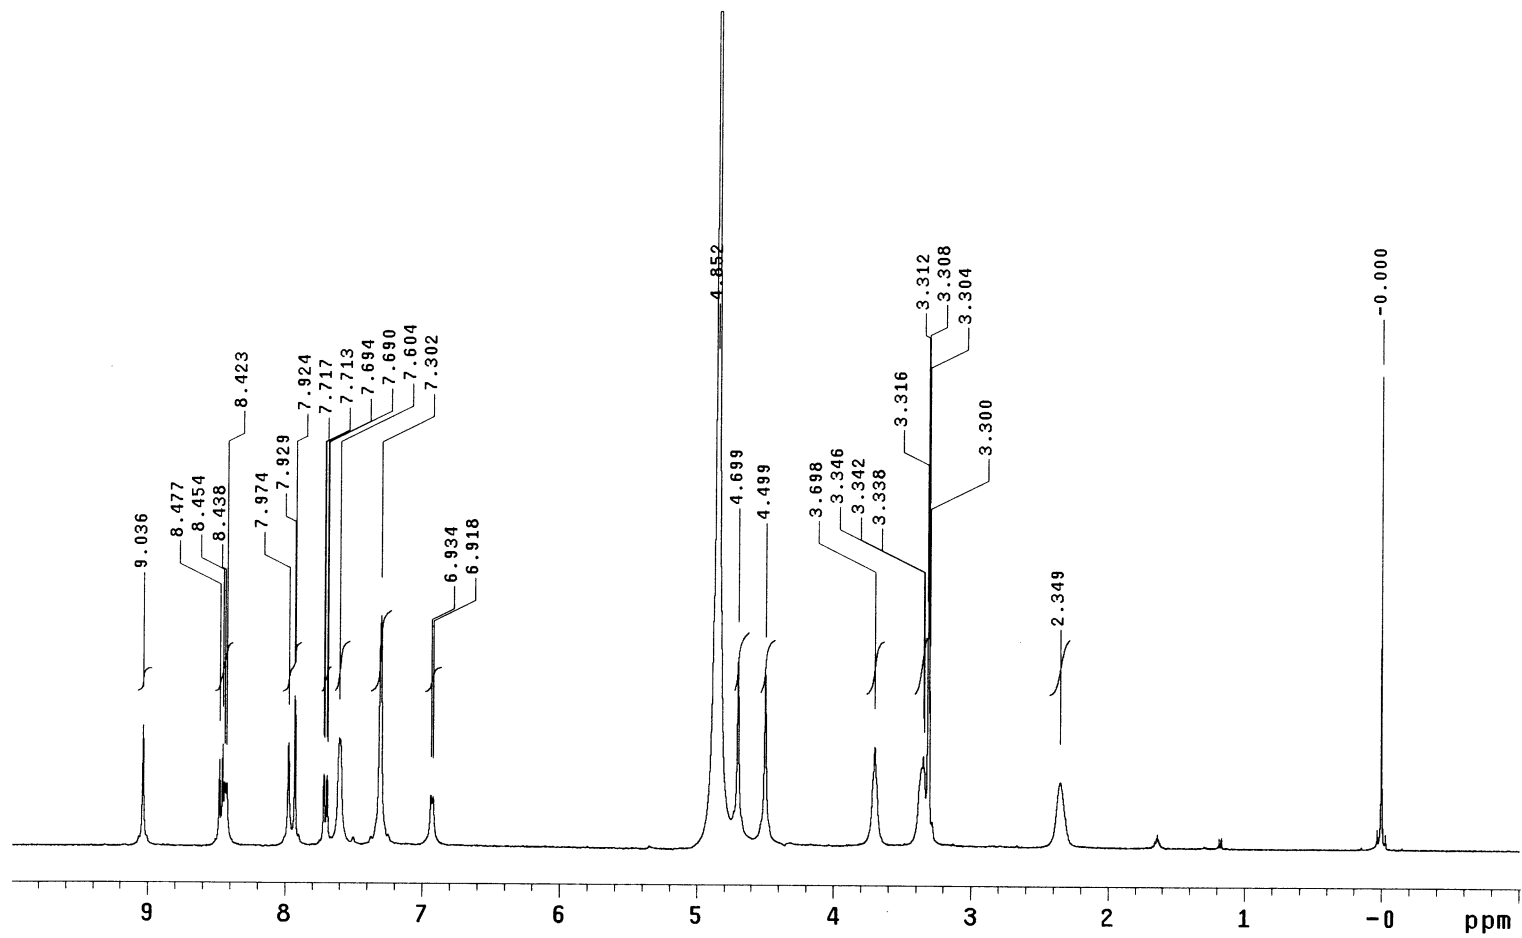

| Chemical Shift (ppm) | Integration |
|----------------------|-------------|
| 9.036                | 0.92        |
| 8.477                | 1.95        |
| 8.454                | 1.96        |
| 8.438                | 2.02        |
| 8.423                | 1.00        |
| 7.974                | 3.27        |
| 7.929                | 1.00        |
| 7.924                | 2.18        |
| 7.717                | 2.48        |
| 7.713                | 2.13        |
| 7.694                | 2.43        |
| 7.690                | 2.23        |
| 7.604                |             |
| 7.302                |             |
| 6.934                |             |
| 6.918                |             |
| 4.852                |             |
| 4.699                |             |
| 4.499                |             |
| 3.698                |             |
| 3.346                |             |
| 3.342                |             |
| 3.338                |             |
| 3.316                |             |
| 3.312                |             |
| 3.308                |             |
| 3.304                |             |
| 3.300                |             |
| 2.349                |             |
| -0.000               |             |

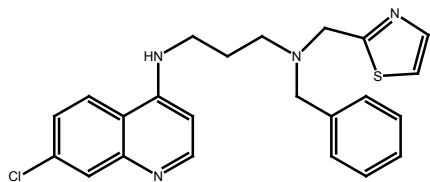

**Compound 1{24,13}**

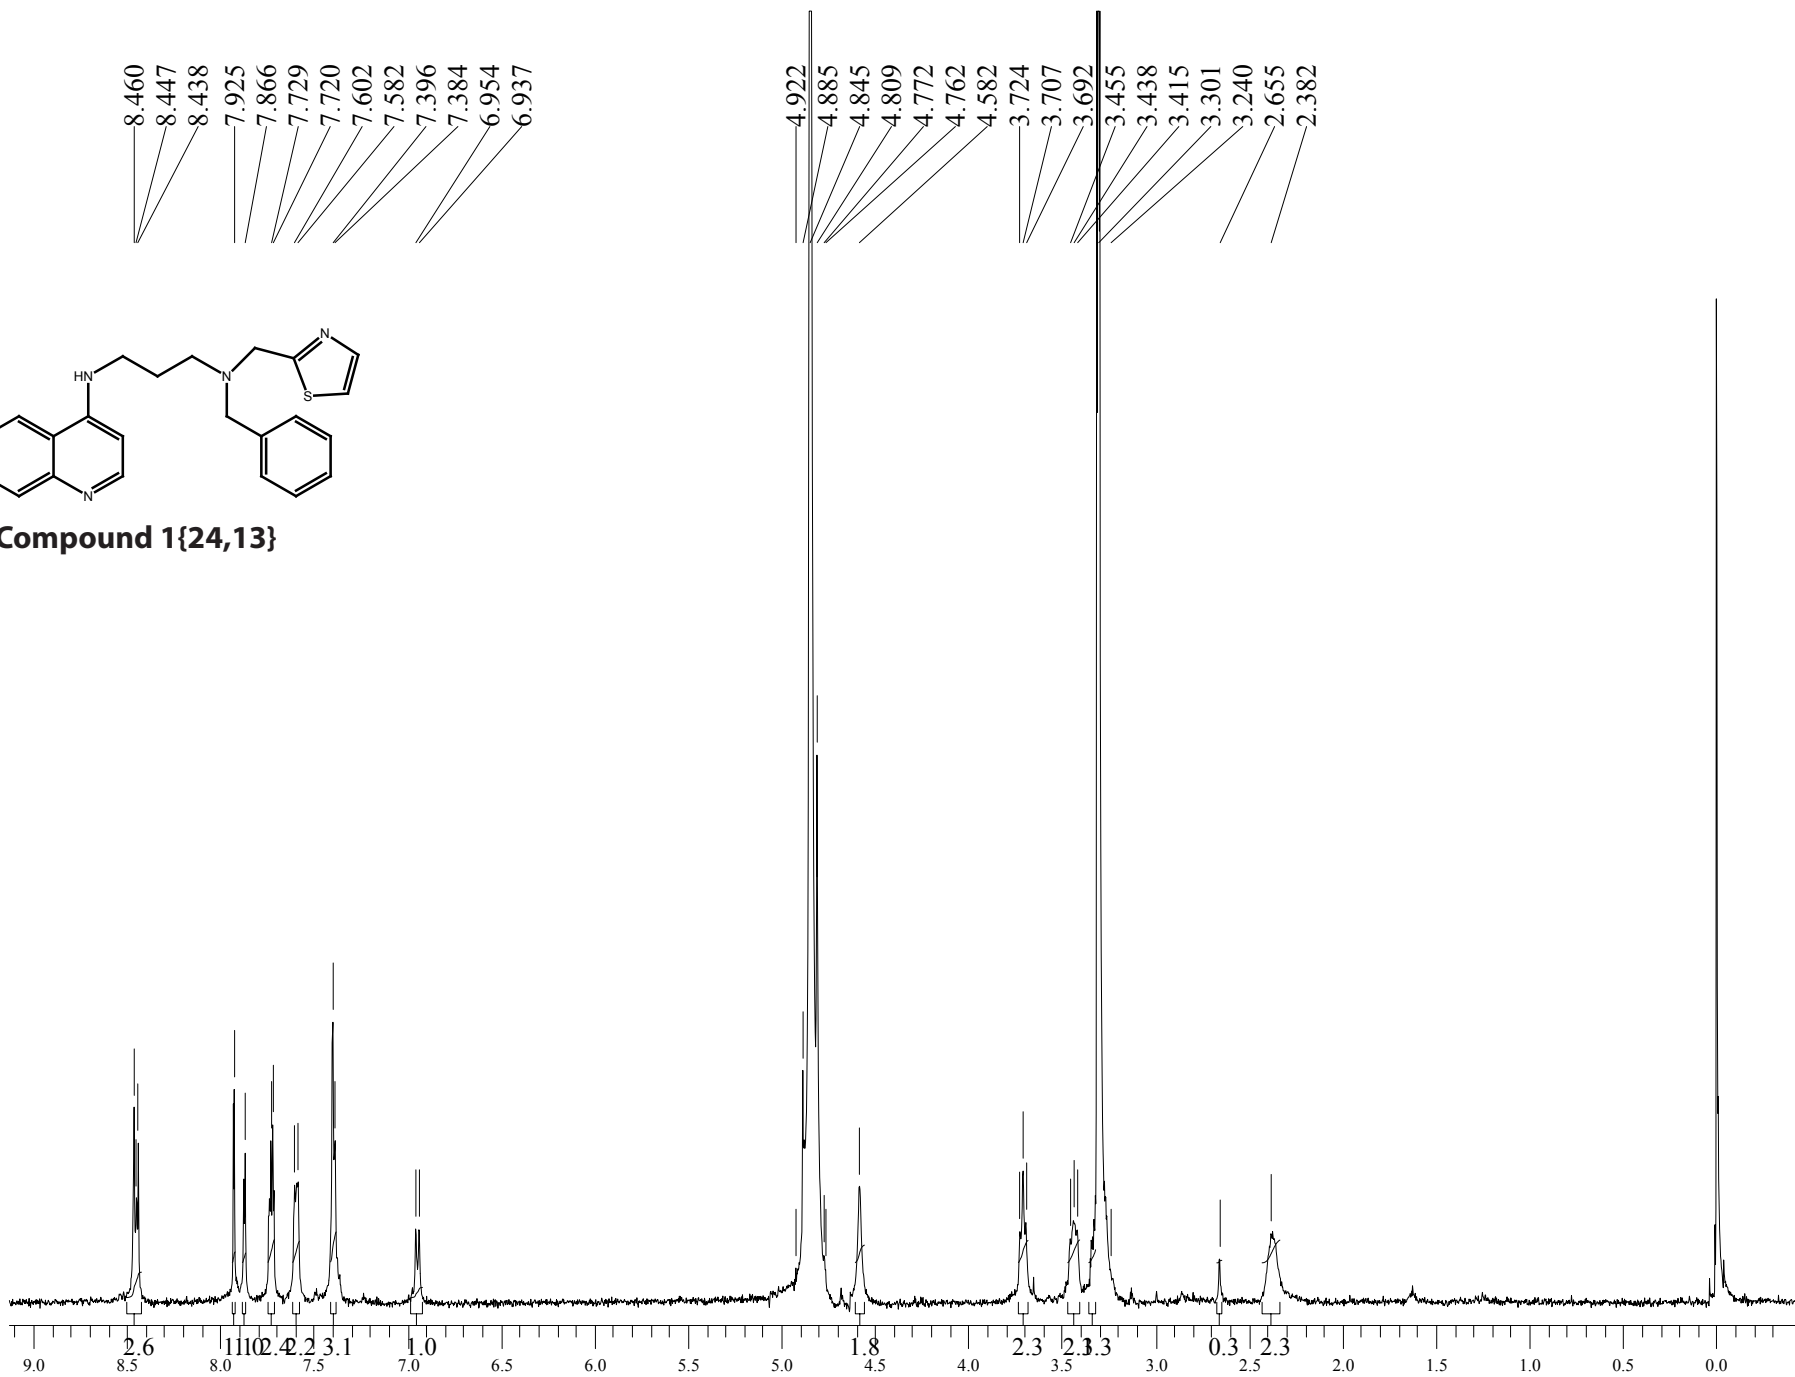

Supplement: NIHMS3282-supplement-SuppInfo.pdf [file NIHMS3282-supplement-SuppInfo.pdf]
